# The formal demography of kinship IV: Two-sex models

Hal Caswell  
Institute for Biodiversity and Ecosystem Dynamics  
The University of Amsterdam  
PO Box 94240  
1090 GE Amsterdam  
The Netherlands

January 17, 2022

## Contents

|                                                                           |           |
|---------------------------------------------------------------------------|-----------|
| <b>Abstract</b>                                                           | <b>3</b>  |
| <b>1 Introduction</b>                                                     | <b>1</b>  |
| 1.1 Notation and terminology . . . . .                                    | 2         |
| <b>2 Principles of the two-sex kinship model</b>                          | <b>2</b>  |
| 2.1 Descendants of Focal . . . . .                                        | 3         |
| 2.2 Accounting for ancestors . . . . .                                    | 6         |
| 2.3 Reproduction by ancestors . . . . .                                   | 7         |
| <b>3 Two-sex kinship dynamics</b>                                         | <b>7</b>  |
| 3.1 Ages at maternity and paternity . . . . .                             | 8         |
| 3.2 Kinship dynamics . . . . .                                            | 8         |
| 3.2.1 Focal . . . . .                                                     | 9         |
| 3.2.2 Children and descendants of Focal . . . . .                         | 9         |
| 3.2.3 Parents and ancestors of Focal . . . . .                            | 9         |
| 3.2.4 Siblings, nieces, and nephews of Focal . . . . .                    | 10        |
| 3.2.5 Aunts and uncles of Focal . . . . .                                 | 11        |
| 3.2.6 Cousins of Focal . . . . .                                          | 12        |
| <b>4 Some two-sex kinship patterns: Senegal, Haiti, France</b>            | <b>12</b> |
| 4.1 Fertility schedules . . . . .                                         | 13        |
| 4.2 Mortality schedules . . . . .                                         | 13        |
| 4.3 Numbers of female and male kin . . . . .                              | 13        |
| 4.4 Kin sex ratios . . . . .                                              | 17        |
| <b>5 Approximations to the two-sex model</b>                              | <b>19</b> |
| 5.1 How good is the androgynous approximation? . . . . .                  | 20        |
| 5.1.1 The contributions of sex-specific mortality and fertility . . . . . | 22        |
| 5.1.2 Total kin numbers: the GKP factors . . . . .                        | 22        |

|                                                                        |           |
|------------------------------------------------------------------------|-----------|
| <b>6 Discussion</b>                                                    | <b>23</b> |
| <b>7 Acknowledgments</b>                                               | <b>25</b> |
| <b>Bibliography</b>                                                    | <b>25</b> |
| <b>Appendix A One-sex, time-varying, and multistate kinship models</b> | <b>28</b> |

## 1 Abstract

2 **Background.** Previous kinship models analyze female kin through female lines of descent,  
3 neglecting male kin and male lines of descent. Because males and females differ in mortality  
4 and fertility, including both sexes in kinship models is an important unsolved problem.

5 **Objectives.** The objectives are to develop a kinship model including female and male  
6 kin through all lines of descent, to explore approximations when full sex-specific rates are  
7 unavailable, and to apply the model to several populations as an example.

8 **Methods.** The kin of a focal individual form an age $\times$ sex-classified population and are  
9 projected as Focal ages using matrix methods, providing expected age-sex structures for  
10 every type of kin at every age of Focal. Initial conditions are based on the distribution of  
11 ages at maternity and paternity.

12 **Results.** The equations for two-sex kinship dynamics are presented. As an example, the  
13 model is applied to populations with large (Senegal), medium (Haiti), and small (France)  
14 differences between female and male fertility. Results include numbers and sex ratios of kin  
15 as Focal ages. An approximation treating female and male rates as identical provides some  
16 insight into kin numbers, even when male and female rates are very different.

17 **Contribution.** Many demographic and sociological parameters (e.g., aspects of health,  
18 bereavement, labor force participation) differ markedly between the sexes. This model per-  
19 mits analysis of such parameters in the context of kinship networks. The matrix formulation  
20 makes it possible to extend the two-sex analysis to include kin loss, multistate kin demogra-  
21 phy, and time varying rates.

## 22 1 Introduction

23 The kinship models of [Caswell \(2019a, 2020\)](#); [Caswell and Song \(2021\)](#), following those of  
24 [Goodman, Keyfitz, and Pullum \(1974\)](#), and including the model of [Coste et al. \(2021\)](#),  
25 describe the kinship network of a focal individual using only female demographic rates. The  
26 result is a projection of female kin (e.g., daughters, granddaughters, ...) through female  
27 lines of descent (e.g., granddaughters include daughters of daughters, but not daughters of  
28 sons). This paper removes this limitation and presents a complete two-sex version of the  
29 matrix analytic kinship model. The kinship network is defined relative to a focal individual,  
30 referred to as Focal. The model provides the age and sex structures of all types of kin through  
31 all lines of descent. Female and male rates generally differ, and this model makes it possible  
32 for the first time to explore the effects of these differences on the kinship network.

33 Differences between female and male rates are well known. Female longevity almost  
34 always exceeds male longevity. The female advantage in life expectancy, on the order of 2–10  
35 years, has long been documented ([Dublin, Lotka, and Spiegelman, 1949](#)). In an analysis of  
36 all countries, [Raftery, Lalic, and Gerland \(2014\)](#) found the median female advantage, from  
37 1950 to 2010, to range from 2.5 to 6 years, with some values as high as 10–12. [Clark and](#)  
38 [Peck \(2012\)](#) found life expectancy gaps of 3–8 years in the late 20th century in an analysis  
39 of 195 countries, and related the gap to factors including women’s status, traditional male  
40 hazards, development, income inequality, and female representation in government. [Glei and](#)  
41 [Horiuchi \(2007\)](#), analyzing 29 high income countries, found the gap affected by changes not  
42 only in the levels but also in the age patterns of male and female mortality. The gaps in  
43 life expectancy are also reflected in differences between women and men in healthy longevity  
44 and the proportion of life spent in poor health ([Luy and Minagawa, 2014](#); [Oksuzyan et al.,](#)  
45 [2014](#)).

46 Male and female fertility can also differ substantially. The most obvious difference is  
47 that men can reproduce at much later ages than women ([Kühnert and Nieschlag, 2004](#);  
48 [Bribiescas, 2016](#); [Paget and Timaeus, 1994](#)). This difference has been used to great effect by  
49 [Tuljapurkar, Puleston, and Gurven \(2007\)](#) as a compelling explanation for the evolution of  
50 post-reproductive survival in human females.

51 In addition to differences in timing, the levels of male and female reproduction often  
52 differ.<sup>1</sup> In a valuable recent review, [Schoumaker \(2019\)](#) analyzes male and female fertility,  
53 ages at parenthood, and trends in these quantities for 160 countries, and provides an extensive  
54 source of data in the online appendices to the article ([Schoumaker, 2019](#), Appendix A).  
55 He reports that male TFR (total fertility rate) almost always exceeds female TFR, by an  
56 amount that increases with female TFR. Thus as a population goes through the demographic  
57 transition, female and male fertility become more similar. The mean age at paternity (the  
58 mean age of childbearing for men) is always greater than the mean age at maternity (mean  
59 age of childbearing for women), by five to fifteen years. Schoumaker presents the age-specific  
60 fertility rates for men and women in Senegal, Haiti, and France (his Figure 4; these will be  
61 used below in Section 4), as typical results for high, medium, and low fertility populations  
62 and explores the roles of overall fertility, economics, and polygyny in determining these  
63 patterns.

64 Incorporating the demographic rates of both sexes makes it possible to explore the conse-  
65 quences of the differences between female and male rates. In particular, questions about the  
66 sex composition of various kinds of kin, as a function of the age of Focal, can be addressed  
67 in this new framework. It is known that differential mortality leads to a female-skewed pop-  
68 ulation structure among the elderly (e.g., 10.8 females per male among supercentenarians;

---

<sup>1</sup> An extreme case is that of Moulay Ismael the Bloodthirsty, the Emperor of Morocco (1672–1727). This unpleasant individual is reported to have sired 888 children. A recent analysis by [Oberzaucher and Grammer \(2014\)](#) has concluded that it is indeed possible to that he could have done so.

69 [Robine and Vaupel 2001](#)). We can ask how this skew will differ among the various kinds of  
70 kin,

71 The attentive reader is no doubt aware that complete sets of male and female rates are  
72 not exactly common, which is true. With this in mind, the model presented here accepts any  
73 level of sex-specificity in the data: (a) age-specific mortality and fertility schedules for both  
74 women and men, (b) sex-specificity in only mortality or only fertility, or (c) no sex-specific  
75 data at all, treating the sexes as identical. The last option does away with all the interesting  
76 effects of the differences between women and men, but still allows an approximate accounting  
77 for the numbers of male and female kin through male and female lines of descent.

78 The two-sex kinship model includes both males and females in the population state vector,  
79 much as [Caswell \(2019a\)](#) incorporated living and dead kin and [Caswell \(2020\)](#) incorporated  
80 age and parity status. Projection matrices that incorporate both male and female rates are  
81 used to generate the dynamics of all types of kin.

82 The model presented here is linear. In principle, two-sex fertility rates in sexually repro-  
83 ducing species must depend on the relative abundance of males and females. This leads to  
84 frequency-dependent nonlinearities embodied in a marriage or mating function (e.g., [Keyfitz,  
85 1972](#); [Iannelli, Martcheva, and Milner, 2005](#); [Shyu and Caswell, 2018](#)). However, this effect  
86 would operate not within the population of a particular type of kin, but in the population as  
87 a whole, which would require an additional model, not considered here. This model, as with  
88 most demographic analyses, is conditional on the hypothesis that male and female fertility  
89 schedules remain in effect throughout the calculation. The incorporation of a fully nonlinear  
90 two-sex model remains an open research problem.

## 91 1.1 Notation and terminology

92 Matrices are denoted by upper case bold characters (e.g.,  $\mathbf{U}$ ) and vectors by lower case bold  
93 characters (e.g.,  $\mathbf{a}$ ). Female and male rates are distinguished by subscripts (e.g.,  $\mathbf{U}_f$  and  
94  $\mathbf{U}_m$ ). Vectors are column vectors by default;  $\mathbf{x}^\top$  is the transpose of  $\mathbf{x}$ . The  $i$ th unit vector (a  
95 vector with a 1 in the  $i$ th location and zeros elsewhere) is  $\mathbf{e}_i$ . The vector  $\mathbf{1}$  is a vector of ones,  
96 and the matrix  $\mathbf{I}$  is the identity matrix. When necessary, subscripts are used to denote the  
97 size of a vector or matrix; e.g.,  $\mathbf{I}_\omega$  is an identity matrix of size  $\omega \times \omega$ . Matrices and vectors  
98 with a tilde (e.g.,  $\tilde{\mathbf{U}}$  or  $\tilde{\mathbf{a}}$ ) are block-structured, containing blocks for females and males.

99 The symbol  $\circ$  denotes the Hadamard, or element-by-element product (implemented by `.*`  
100 in MATLAB and by `*` in R). The symbol  $\otimes$  denotes the Kronecker product. The `vec` operator  
101 stacks the columns of a  $m \times n$  matrix into a  $mn \times 1$  column vector. The notation  $\|\mathbf{x}\|$  denotes  
102 the 1-norm of  $\mathbf{x}$ . On occasion, MATLAB notation will be used to refer to rows and columns;  
103 e.g.,  $\mathbf{F}(i, :)$  and  $\mathbf{F}(:, j)$  refer to the  $i$ th row and  $j$ th column of the matrix  $\mathbf{F}$ .

## 104 2 Principles of the two-sex kinship model

105 Before presenting the complete derivation (Section 3), it is helpful to consider the principles  
106 along which the model is organized. The kinship network, as shown in Figure 1, consists of  
107 descendants of Focal (children, grandchildren, etc.), ancestors of Focal (parents, grandpar-  
108 ents), and descendants of ancestors (siblings, aunts, cousins, etc.). Each kin type is identified  
109 by a letter; these become variables in the model.

110 Each kin type contains a set of subtypes defined by sex and line of descent. These will  
111 be compressed, under a reasonable set of assumptions, to individuals classified by age and  
112 sex. To show the principles, consider the descendants and the ancestors of Focal.

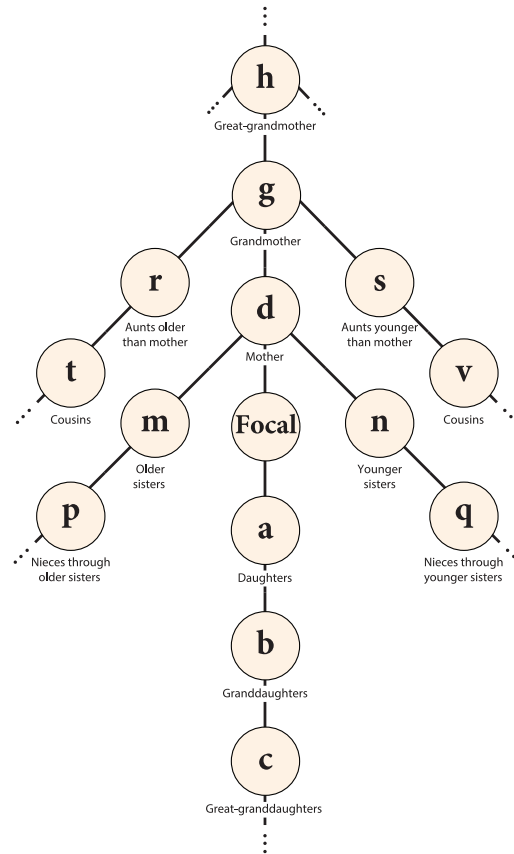

**Figure 1:** The kinship network surrounding the Focal individual. Symbols ( $\mathbf{a}$ ,  $\mathbf{b}$ , etc.) denote the age structure vectors of each type of kin of Focal. Modified from Caswell (2019a) based on network defined in Goodman, Keyfitz, and Pullum (1974) and Keyfitz and Caswell (2005).

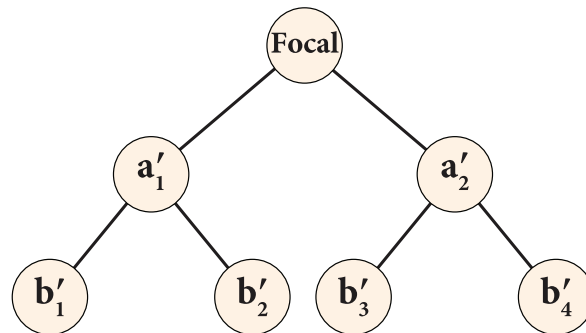

**Figure 2:** Female and male children ( $\mathbf{a}'_1$  and  $\mathbf{a}'_2$ ) and grandchildren ( $\mathbf{b}'_1, \dots, \mathbf{b}'_4$ ) of Focal. The symbols represent age distribution vectors; the primes indicate that kin are defined by sex and by line of descent.

## 113 2.1 Descendants of Focal

114 In Figure 2, Focal produces two types of children, daughters and sons. These give rise to four  
 115 types of grandchildren: daughters of daughters, daughters of sons, sons of daughters, and sons  
 116 of sons. This chain of descendants extends naturally to eight types of great-grandchildren,  
 117 and so on.

118 The vectors  $\mathbf{a}'_1, \mathbf{a}'_2, \mathbf{b}'_1, \dots, \mathbf{b}'_4$  are the age structure vectors of each of these types of kin.  
 119 Our convention is to number females first (1, 3, 5, ...) and males second (2, 4, 6, ...). The

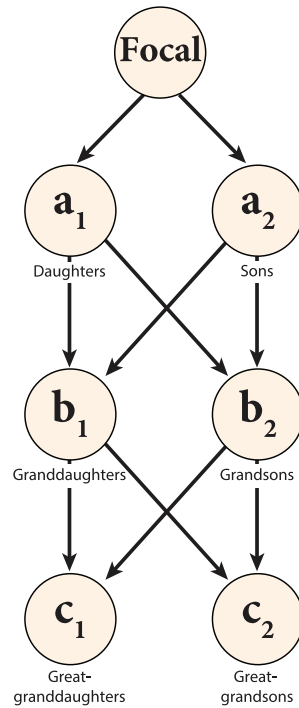

**Figure 3:** Female and male children, grandchildren, and great-grandchildren of Focal. Obtained from the graph in Figure 2 by combining male and female kin, regardless of lines of descent.

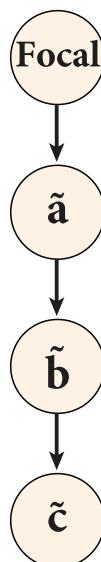

**Figure 4:** The children, grandchildren, and great-grandchildren of Focal. The female and male kin in Figure 3 have been combined into the block-structured vectors  $\tilde{\mathbf{a}}$ ,  $\tilde{\mathbf{b}}$ , and  $\tilde{\mathbf{c}}$ .

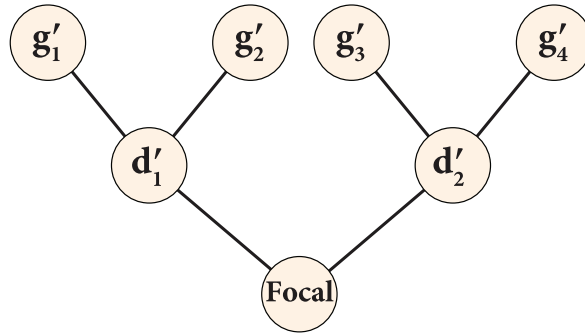

**Figure 5:** Accounting for the parents ( $\mathbf{d}'_1$  and  $\mathbf{d}'_2$ ) and grandparents ( $\mathbf{g}'_1, \dots, \mathbf{g}'_4$ ) of Focal. Symbols represent age structure vectors; primes indicate that individuals are characterized by both sex and chains of ancestry.

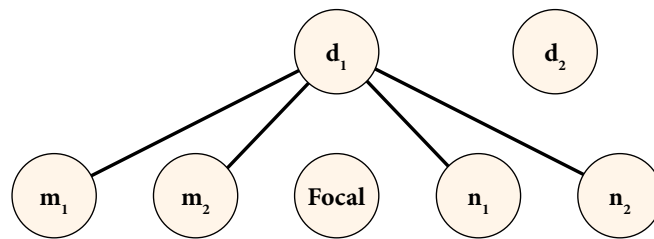

**Figure 6:** An example of reproduction by ancestors (parents, in this case) of Focal. All reproduction by Focal's parents, producing older and younger sisters and brothers, is attributed to Focal's mother.

120 primes appearing in Figure 2 indicate that those vectors are specific to both sex and line of  
 121 descent. (We will eliminate them shortly.)

122 We begin by specifying notation. Define

123  $\mathbf{U}_f, \mathbf{U}_m$  = female and male survival matrices (1)

124  $\mathbf{F}_f, \mathbf{F}_m$  = female and male fertility matrices (2)

125  $\boldsymbol{\pi}_f, \boldsymbol{\pi}_m$  = distribution of ages at maternity and paternity (3)

126  $\alpha$  = proportion males among offspring (4)

127  $\bar{\alpha} = 1 - \alpha$  (5)

128 survival matrices contain age-specific survival probabilities on the subdiagonal and zeros  
 129 elsewhere. Fertility matrices contain age-specific fertility rates on the first row and zeros  
 130 elsewhere. The proportion of males at birth  $\alpha = 0.5$  throughout. The distributions  $\boldsymbol{\pi}_f$  and  
 131  $\boldsymbol{\pi}_m$  are defined in Section 3.1.

132 For the case of the children in Figure 2, we write

133 
$$\begin{pmatrix} \mathbf{a}_1 \\ \mathbf{a}_2 \end{pmatrix} (x+1) = \begin{pmatrix} \mathbf{U}_f & \mathbf{0} \\ \mathbf{0} & \mathbf{U}_m \end{pmatrix} \begin{pmatrix} \mathbf{a}_1 \\ \mathbf{a}_2 \end{pmatrix} (x) + \begin{pmatrix} \bar{\alpha}\mathbf{F}_f & \bar{\alpha}\mathbf{F}_m \\ \alpha\mathbf{F}_f & \alpha\mathbf{F}_m \end{pmatrix} \begin{pmatrix} \boldsymbol{\phi}_f \\ \boldsymbol{\phi}_m \end{pmatrix} (x) \quad (6)$$

134 Daughters and sons survive according to the matrices  $\mathbf{U}_f$  and  $\mathbf{U}_m$ . New children are produced  
 135 by the fertility of Focal. If Focal is a female, then  $\boldsymbol{\phi}_f(x) = \mathbf{e}_x$ , where  $\mathbf{e}_x$  is a vector of length  
 136  $\omega$  with a 1 in the  $x$ th entry and zeros elsewhere, and  $\boldsymbol{\phi}_m(x) = \mathbf{0}$ . If Focal is male, then these  
 137 vectors are reversed.

138 The dynamics of grandchildren must account for all four types of grandchildren shown



139 in Figure 2:

$$140 \quad \begin{pmatrix} \mathbf{b}'_1 \\ \mathbf{b}'_2 \\ \mathbf{b}'_3 \\ \mathbf{b}'_4 \end{pmatrix} (x+1) = \begin{pmatrix} \mathbf{U}_1 & & & \\ & \mathbf{U}_2 & & \\ & & \mathbf{U}_3 & \\ & & & \mathbf{U}_4 \end{pmatrix} \begin{pmatrix} \mathbf{b}'_1 \\ \mathbf{b}'_2 \\ \mathbf{b}'_3 \\ \mathbf{b}'_4 \end{pmatrix} (x) + \begin{pmatrix} \bar{\alpha}\mathbf{F}_f & \mathbf{0} \\ \alpha\mathbf{F}_f & \mathbf{0} \\ \mathbf{0} & \bar{\alpha}\mathbf{F}_m \\ \mathbf{0} & \alpha\mathbf{F}_m \end{pmatrix} \begin{pmatrix} \mathbf{a}_1 \\ \mathbf{a}_2 \end{pmatrix} (x) \quad (7)$$

141 As written, equation (7) permits each of the four types of grandchildren to experience its  
 142 own survival schedule, and each of the two types of children to contribute according to its  
 143 own fertility schedule. The corresponding model for great-grandchildren would include eight  
 144 survival matrices,  $\mathbf{U}_1, \dots, \mathbf{U}_8$  and four fertility matrices  $\mathbf{F}_1, \dots, \mathbf{F}_4$ . And so on.

145 Let us make the usual assumption that the demographic rates are affected by sex but  
 146 not by line of descent from an arbitrarily defined Focal individual. Then

$$147 \quad \mathbf{U}_1 = \mathbf{U}_3 = \mathbf{U}_f \quad (8)$$

$$148 \quad \mathbf{U}_2 = \mathbf{U}_4 = \mathbf{U}_m \quad (9)$$

149 Under this assumption, the four types of grandchildren can be aggregated into granddaugh-  
 150 ters and grandsons, ignoring their lines of descent from Focal. Define

$$151 \quad \mathbf{b}_1 = \mathbf{b}'_1 + \mathbf{b}'_3 \quad (\text{granddaughters}) \quad (10)$$

$$152 \quad \mathbf{b}_2 = \mathbf{b}'_2 + \mathbf{b}'_4 \quad (\text{grandsons}). \quad (11)$$

153 The dynamics then become

$$154 \quad \begin{pmatrix} \mathbf{b}_1 \\ \mathbf{b}_2 \end{pmatrix} (x+1) = \begin{pmatrix} \mathbf{U}_f & \mathbf{0} \\ \mathbf{0} & \mathbf{U}_m \end{pmatrix} \begin{pmatrix} \mathbf{b}_1 \\ \mathbf{b}_2 \end{pmatrix} (x) + \begin{pmatrix} \bar{\alpha}\mathbf{F}_f & \bar{\alpha}\mathbf{F}_m \\ \alpha\mathbf{F}_f & \alpha\mathbf{F}_m \end{pmatrix} \begin{pmatrix} \mathbf{a}_1 \\ \mathbf{a}_2 \end{pmatrix} (x) \quad (12)$$

155 This pattern continues for subsequent generations of descendants, leading to the pattern  
 156 shown in Figure 3, in which female and male children, grandchildren, and so on are produced  
 157 by the female and male survival and fertility matrices.<sup>2</sup>

158 A final notational simplification follows from writing the vectors containing female and  
 159 male age distributions as

$$160 \quad \begin{pmatrix} \mathbf{a}_1 \\ \mathbf{a}_2 \end{pmatrix} = \tilde{\mathbf{a}} \quad \begin{pmatrix} \mathbf{b}_1 \\ \mathbf{b}_2 \end{pmatrix} = \tilde{\mathbf{b}}. \quad (13)$$

161 If appropriate block-structured matrices are defined, Figure 3 reduces to Figure 4 and equa-  
 162 tions (6) and (12) simplify to the projections of a single vector. Section 3 develops the entire  
 163 kinship model in these terms.

## 164 2.2 Accounting for ancestors

165 Focal has a network of female and male ancestors, as shown in Figure 5. She has two parents  
 166 (mothers  $\mathbf{d}'_1$  and fathers  $\mathbf{d}'_2$ ), four grandparents (maternal  $\mathbf{g}'_1$  and  $\mathbf{g}'_2$ ; paternal  $\mathbf{g}'_3$  and  $\mathbf{g}'_4$ ).  
 167 The pattern continues for as many levels as desired, the number of types of ancestors doubling  
 168 with each level.

<sup>2</sup>There exist situations in which the full structure of Figure 2 and equation (7) would be of interest. For example, evolutionary calculations based on kin selection depend on the sharing of genes between individuals. Because maternity is more certain than paternity, Focal is more certain that she shares 1/4 of her genes with the children of her daughters,  $\mathbf{b}'_1$  and  $\mathbf{b}'_2$  than she is for the children of her sons,  $\mathbf{b}'_3$  and  $\mathbf{b}'_4$ . In general, each passage through a male descendant will introduce some uncertainty into the inheritance.

A related issue arises with respect to mitochondrial DNA, which is passed from mothers to offspring, and Y chromosomes, which are transmitted from fathers to sons; calculations involving these forms of inheritance might benefit from being able to distinguish kin by lines of descent. See [Tanskanen and Danielsbacka \(2019\)](#), especially their Table 2.2, for a summary of these issues.

169 Consider the grandparents. Their dynamics satisfy

$$170 \quad \begin{pmatrix} \mathbf{g}'_1 \\ \mathbf{g}'_2 \\ \mathbf{g}'_3 \\ \mathbf{g}'_4 \end{pmatrix} (x+1) = \begin{pmatrix} \mathbf{U}_1 & & & \\ & \mathbf{U}_2 & & \\ & & \mathbf{U}_3 & \\ & & & \mathbf{U}_4 \end{pmatrix} \begin{pmatrix} \mathbf{g}'_1 \\ \mathbf{g}'_2 \\ \mathbf{g}'_3 \\ \mathbf{g}'_4 \end{pmatrix} (x) + \mathbf{0} \quad (14)$$

171 where the recruitment term is zero because Focal accumulates no new biological ancestors  
172 after her birth. Combining the maternal and paternal grandparents of each sex yields

$$173 \quad \begin{pmatrix} \mathbf{g}_1 \\ \mathbf{g}_2 \end{pmatrix} (x+1) = \begin{pmatrix} \mathbf{U}_f & \mathbf{0} \\ \mathbf{0} & \mathbf{U}_m \end{pmatrix} \begin{pmatrix} \mathbf{g}_1 \\ \mathbf{g}_2 \end{pmatrix} (x) + \mathbf{0}. \quad (15)$$

### 174 2.3 Reproduction by ancestors

175 The reproduction of the ancestors of Focal produces the side chains in Figure 1. In the  
176 two-sex model, reproduction must account for the lack of independence of pairs of ancestors.  
177 Consider Focal's daughters and sons. They can be assumed to reproduce independently to  
178 produce grandchildren, and are treated so in Figure 3 and equation (12). But Focal's mother  
179 and father do not reproduce independently to produce her siblings. Therefore, as shown in  
180 Figure 6, we credit the reproduction of Focal's parents to her mother, following the female  
181 fertility schedule (a kind of female dominance assumption).

$$182 \quad \begin{pmatrix} \mathbf{m}_1 \\ \mathbf{m}_2 \end{pmatrix} (x+1) = \begin{pmatrix} \mathbf{U}_f & \mathbf{0} \\ \mathbf{0} & \mathbf{U}_m \end{pmatrix} \begin{pmatrix} \mathbf{m}_1 \\ \mathbf{m}_2 \end{pmatrix} (x) + \begin{pmatrix} \bar{\alpha}\mathbf{F}_f & \mathbf{0} \\ \alpha\mathbf{F}_m & \mathbf{0} \end{pmatrix} \begin{pmatrix} \mathbf{d}_1 \\ \mathbf{d}_2 \end{pmatrix} (x) \quad (16)$$

183 Notice the difference between the block-structured fertility matrices in (16) and (12).

## 184 3 Two-sex kinship dynamics

185 For some type  $\mathbf{k}$  of kin, we write

$$186 \quad \tilde{\mathbf{k}}(x) = \begin{pmatrix} \mathbf{k}_f \\ \mathbf{k}_m \end{pmatrix} (x) \quad (17)$$

187 where  $x$  is the age of Focal. The tilde denotes block structured vectors and matrices composed  
188 of female and male parts.

189 The dynamics of  $\mathbf{k}(x)$  are written as

$$190 \quad \begin{pmatrix} \mathbf{k}_f \\ \mathbf{k}_m \end{pmatrix} (x+1) = \begin{pmatrix} \mathbf{U}_f & \mathbf{0} \\ \mathbf{0} & \mathbf{U}_m \end{pmatrix} \begin{pmatrix} \mathbf{k}_f \\ \mathbf{k}_m \end{pmatrix} (x) + \begin{pmatrix} \boldsymbol{\beta}_f \\ \boldsymbol{\beta}_m \end{pmatrix} (x) \quad (18)$$

191 or

$$192 \quad \tilde{\mathbf{k}}(x+1) = \tilde{\mathbf{U}}\tilde{\mathbf{k}}(x) + \tilde{\boldsymbol{\beta}}(x). \quad (19)$$

193 The recruitment subsidy term  $\tilde{\boldsymbol{\beta}}(x)$  depends on the nature of the kin that provide the re-  
194 cruitment.

- 195 • If the subsidy is provided by reproduction of one of the direct ancestors of Focal  
196 (parents, grandparents, etc.), then, as in equation (16)

$$197 \quad \begin{pmatrix} \boldsymbol{\beta}_f \\ \boldsymbol{\beta}_m \end{pmatrix} (x) = \begin{pmatrix} \bar{\alpha}\mathbf{F}_f & \mathbf{0} \\ \alpha\mathbf{F}_f & \mathbf{0} \end{pmatrix} \begin{pmatrix} \mathbf{k}^*_f \\ \mathbf{k}^*_m \end{pmatrix} (x) \quad (20)$$

$$198 \quad \tilde{\boldsymbol{\beta}}(x) = \tilde{\mathbf{F}}^*\tilde{\mathbf{k}}(x) \quad (21)$$

199 where  $\mathbf{k}^*$  denotes the source kin (e.g., mothers are the source of the siblings of focal).  
200 The matrix  $\tilde{\mathbf{F}}^*$  captures reproduction of both female and male offspring by females.

- 201 • If the subsidy is provided by any other kin type, then as in equation (12)

$$202 \begin{pmatrix} \beta_f \\ \beta_m \end{pmatrix} (x) = \begin{pmatrix} \bar{\alpha} \mathbf{F}_f & \bar{\alpha} \mathbf{F}_m \\ \alpha \mathbf{F}_f & \alpha \mathbf{F}_m \end{pmatrix} \begin{pmatrix} \mathbf{k}_f^* \\ \mathbf{k}_m^* \end{pmatrix} (x) \quad (22)$$

$$203 \tilde{\beta}(x) = \tilde{\mathbf{F}} \tilde{\mathbf{k}}(x) \quad (23)$$

204 where  $\mathbf{k}^*$  again denotes the source kin (e.g., children are the source of the grandchildren  
205 of focal).

- 206 • If there is no recruitment subsidy, as in (15), then  $\tilde{\beta} = \mathbf{0}$ .

### 207 3.1 Ages at maternity and paternity

208 The matrices  $\mathbf{F}_f$  and  $\mathbf{F}_m$  contain age-specific fertilities for females and males respectively.  
209 The distributions of the ages of mothers and of fathers are obtained by applying these per  
210 capita rates to age distributions of women and men, respectively. Let

$$211 \tilde{\mathbf{z}} = \begin{pmatrix} \mathbf{z}_f \\ \mathbf{z}_m \end{pmatrix} \quad (24)$$

212 be the age structure of the population. The age distributions of maternity and paternity are

$$213 \pi_f = \frac{\mathbf{F}_f(1, :)^T \circ \mathbf{z}_f}{\|\mathbf{F}_f(1, :)^T \circ \mathbf{z}_f\|} \quad (25)$$

$$214 \pi_m = \frac{\mathbf{F}_m(1, :)^T \circ \mathbf{z}_m}{\|\mathbf{F}_m(1, :)^T \circ \mathbf{z}_m\|} \quad (26)$$

215 and we write

$$216 \tilde{\pi} = \begin{pmatrix} \pi_f \\ \pi_m \end{pmatrix}. \quad (27)$$

217 The age structure  $\tilde{\mathbf{z}}$  could be obtained from projection of a previous population (Caswell and  
218 Song, 2021) or from an observed population structure. Here, following Goodman, Keyfitz,  
219 and Pullum 1974; Caswell 2019a, 2020, we use the stable population defined by the demo-  
220 graphic rates in  $\tilde{\mathbf{U}}$  and  $\tilde{\mathbf{F}}$ . Define a projection matrix for the female dominant population

$$221 \tilde{\mathbf{A}} = \begin{pmatrix} \mathbf{U}_f & \mathbf{0} \\ \mathbf{0} & \mathbf{U}_m \end{pmatrix} + \begin{pmatrix} \bar{\alpha} \mathbf{F}_f & \mathbf{0} \\ \alpha \mathbf{F}_f & \mathbf{0} \end{pmatrix}. \quad (28)$$

222 The stable sex-age structure is given by the eigenvector  $\tilde{\mathbf{w}}$  corresponding to the dominant  
223 eigenvalue of  $\tilde{\mathbf{A}}$ . Without loss of generality, we scale  $\tilde{\mathbf{w}}$  so that its entries are non-negative,  
224 write

$$225 \tilde{\mathbf{w}} = \begin{pmatrix} \mathbf{w}_f \\ \mathbf{w}_m \end{pmatrix} \quad (29)$$

226 and substitute  $\tilde{\mathbf{w}}$  for  $\tilde{\mathbf{z}}$  in (24). Notice the use of  $\tilde{\mathbf{F}}^*$  rather than  $\tilde{\mathbf{F}}$ ; this corresponds to the  
227 usual female dominance assumption in stable population theory.

### 228 3.2 Kinship dynamics

229 We turn now to the model for each type of kin.

### 230 3.2.1 Focal

231 Focal is an individual of specified sex, alive at age  $x$ . The state of Focal is given by the  
232 vector

$$233 \quad \tilde{\phi}(x) = \begin{pmatrix} \phi_f \\ \phi_m \end{pmatrix} (x) \quad (30)$$

234 This can be extended to cases where Focal is classified by stage as well as age, following the  
235 methods in [Caswell \(2020\)](#).

### 236 3.2.2 Children and descendants of Focal

237 The dynamics of the children of focal are given by

$$238 \quad \tilde{\mathbf{a}}(x+1) = \tilde{\mathbf{U}}\tilde{\mathbf{a}}(x) + \tilde{\mathbf{F}}\tilde{\phi}(x) \quad (31)$$

$$239 \quad \tilde{\mathbf{a}}(0) = \mathbf{0} \quad (32)$$

240 The dynamics of the grandchildren of focal are given by

$$241 \quad \tilde{\mathbf{b}}(x+1) = \tilde{\mathbf{U}}\tilde{\mathbf{b}}(x) + \tilde{\mathbf{F}}\tilde{\mathbf{a}}(x) \quad (33)$$

$$242 \quad \tilde{\mathbf{b}}(0) = \mathbf{0} \quad (34)$$

243 The dynamics of the great-grandchildren of focal are given by

$$244 \quad \tilde{\mathbf{c}}(x+1) = \tilde{\mathbf{U}}\tilde{\mathbf{c}}(x) + \tilde{\mathbf{F}}\tilde{\mathbf{b}}(x) \quad (35)$$

$$245 \quad \tilde{\mathbf{c}}(0) = \mathbf{0} \quad (36)$$

246 In each case, the initial condition is zero (Focal has no children, grandchildren, etc. when  
247 she is born). The recruitment of each generation of descendants comes from the fertility of  
248 the previous generation.

249 The chain of descendants can be extended as far as desired, as is also true of the matrix  
250 models of [Caswell \(2019a, 2020\)](#); [Caswell and Song \(2021\)](#), To do so, let  $\tilde{\mathbf{k}}_i(x)$  be the state  
251 vector of the  $i$ th generation of descendants, with Focal defined as generation 0. Then

$$252 \quad \tilde{\mathbf{k}}_i(x+1) = \tilde{\mathbf{U}}\tilde{\mathbf{k}}_i(x) + \tilde{\mathbf{F}}\tilde{\mathbf{k}}_{i-1}(x) \quad i = 1, \dots \quad (37)$$

$$253 \quad \tilde{\mathbf{k}}_i(0) = \mathbf{0} \quad (38)$$

### 254 3.2.3 Parents and ancestors of Focal

255 Counting the ancestors (parents, grandparents, etc.) of Focal involves going up the branching  
256 network shown in Figure 5. We know that, at birth, Focal had exactly one living mother.  
257 We will assume that she also has one living father, thus ignoring paternal mortality in the  
258 nine months between conception and birth.

259 The ages of Focal's parents at her birth are unknown, so we treat her mother and father  
260 as being selected at random from the distributions  $\boldsymbol{\pi}_f$  and  $\boldsymbol{\pi}_m$  of the ages of mothers and  
261 fathers at the birth of children.

262 Under these assumptions, the dynamics of the parents of Focal are given by

$$263 \quad \tilde{\mathbf{d}}(x+1) = \tilde{\mathbf{U}}\tilde{\mathbf{d}}(x) + \mathbf{0} \quad (39)$$

$$264 \quad \tilde{\mathbf{d}}(0) = \tilde{\boldsymbol{\pi}} \quad (40)$$

265 Focal accumulates no new parents after her birth, so the recruitment term is zero.

266 The dynamics of the grandparents of Focal are given by

$$267 \quad \tilde{\mathbf{g}}(x+1) = \tilde{\mathbf{U}}\tilde{\mathbf{g}}(x) + \mathbf{0} \quad (41)$$

$$268 \quad \tilde{\mathbf{g}}(0) = \sum_i [\pi_f(i) + \pi_m(i)] \tilde{\mathbf{d}}(i) \quad (42)$$

269 The initial condition  $\tilde{\mathbf{g}}(0)$  is obtained by noting that the grandparents of Focal are the parents  
270 of Focal's parents. Thus we could write

$$271 \quad \tilde{\mathbf{g}}(0) = \begin{pmatrix} \text{mothers of mom} \\ \text{fathers of mom} \end{pmatrix} (0) + \begin{pmatrix} \text{mothers of dad} \\ \text{fathers of dad} \end{pmatrix} (0) \quad (43)$$

272 We do not know the ages of Focal's mother or father, but we know their distributions, so

$$273 \quad \tilde{\mathbf{g}}(0) = \begin{pmatrix} \sum_i \pi_f(i) \mathbf{d}_f(i) \\ \sum_i \pi_f(i) \mathbf{d}_m(i) \end{pmatrix} + \begin{pmatrix} \sum_i \pi_m(i) \mathbf{d}_f(i) \\ \sum_i \pi_m(i) \mathbf{d}_m(i) \end{pmatrix} \quad (44)$$

$$274 \quad = \sum_i \pi_f(i) \tilde{\mathbf{d}}(i) + \sum_i \pi_m(i) \tilde{\mathbf{d}}(i) \quad (45)$$

$$275 \quad = \sum_i [\pi_f(i) + \pi_m(i)] \tilde{\mathbf{d}}(i) \quad (46)$$

276 The dynamics of the great-grandparents of Focal follow the same pattern. The great-  
277 grandparents of Focal at her birth are the grandparents of Focal's parents, so

$$278 \quad \tilde{\mathbf{h}}(x+1) = \tilde{\mathbf{U}}\tilde{\mathbf{h}}(x) + \mathbf{0} \quad (47)$$

$$279 \quad \tilde{\mathbf{h}}(0) = \sum_i [\pi_f(i) + \pi_m(i)] \tilde{\mathbf{g}}(i) \quad (48)$$

280 As with descendants, the ancestors can be calculated back as far as desired. For this  
281 calculation, let  $\tilde{\mathbf{k}}_j$  be the kin vector of the  $j$ th generation of ancestors, where parents are  
282 generation zero. Then, for  $j \geq 1$ ,

$$283 \quad \tilde{\mathbf{k}}_j(x+1) = \tilde{\mathbf{U}}\tilde{\mathbf{k}}_j(x) + \mathbf{0} \quad (49)$$

$$284 \quad \tilde{\mathbf{k}}_j(0) = \sum_i [\pi_f(i) + \pi_m(i)] \tilde{\mathbf{k}}_{i-1}(j) \quad (50)$$

### 285 3.2.4 Siblings, nieces, and nephews of Focal

286 We turn next to the siblings, nieces, and nephews of Focal. Inconveniently, English seems  
287 to have no gender neutral collective term for nieces and nephews, as sibling is for brothers  
288 and sisters. The term "nibling" has been suggested, according to the internet. German  
289 has such a term, "Geschwisterkind," meaning child of a sibling. There also seems to be no  
290 gender-neutral collective term for aunts and uncles (next section).

291 **Siblings.** The older and younger siblings of Focal are treated separately because they have  
292 different dynamics.

293 Focal may have older siblings at her birth, but she can accumulate no more of them after  
294 she is born, so the recruitment term is zero. Older siblings at Focal's birth are the children of  
295 Focal's mother at Focal's birth. Focal's mother and father do not reproduce independently,  
296 so the initial condition is credited to Focal's mother and calculated as an average over  $\pi_f$   
297 only. Thus

$$298 \quad \tilde{\mathbf{m}}(x+1) = \tilde{\mathbf{U}}\tilde{\mathbf{m}}(x) + \mathbf{0} \quad (51)$$

$$299 \quad \tilde{\mathbf{m}}(0) = \sum_i \pi_f(i) \tilde{\mathbf{a}}(i) \quad (52)$$

300 Focal has no younger siblings at her birth,<sup>3</sup> but can accumulate younger siblings through  
 301 her mother’s reproduction. Thus

$$302 \quad \tilde{\mathbf{n}}(x+1) = \tilde{\mathbf{U}}\tilde{\mathbf{n}}(x) + \tilde{\mathbf{F}}^* \tilde{\mathbf{d}}(x) \quad (53)$$

$$303 \quad \tilde{\mathbf{m}}(0) = \mathbf{0} \quad (54)$$

304 The matrix  $\tilde{\mathbf{F}}^*$  ensures that the recruitment of new younger siblings comes from the repro-  
 305 duction of Focal’s mother following the female fertility schedule, as in Figure 6.

306 **Niblings.** Then niblings of Focal are the children of Focal’s older and younger siblings.

307 The recruitment of niblings through older siblings comes from the reproduction of those  
 308 siblings, both brothers and sisters contributing independently. The initial condition follows  
 309 from the fact that, at the time of Focal’s birth, these niblings are the grandchildren of Focal’s  
 310 mother. Thus, the dynamics of nieces and nephews through older siblings are

$$311 \quad \tilde{\mathbf{p}}(x+1) = \tilde{\mathbf{U}}\tilde{\mathbf{p}}(x) + \tilde{\mathbf{F}} \tilde{\mathbf{m}}(x) \quad (55)$$

$$312 \quad \tilde{\mathbf{p}}(0) = \sum_i \pi_f(i) \tilde{\mathbf{b}}(i) \quad (56)$$

313 This line of descent can be continued indefinitely. Each generation receives its recruitment  
 314 from the generation before (grand-niblings from niblings, etc.). The initial condition for each  
 315 generation is the corresponding descendant of Focal’s mother: niblings are the grandchildren  
 316 of Focal’s mother; grand-niblings are the great-grandchildren, and so on.

317 The recruitment of niblings through younger siblings comes from the reproduction of  
 318 those younger siblings. The initial condition is zero, because Focal has no younger siblings  
 319 at birth, and hence can have no nieces or nephews through them. The resulting dynamics  
 320 are

$$321 \quad \tilde{\mathbf{q}}(x+1) = \tilde{\mathbf{U}}\tilde{\mathbf{q}}(x) + \tilde{\mathbf{F}} \tilde{\mathbf{n}}(x) \quad (57)$$

$$322 \quad \tilde{\mathbf{q}}(0) = \mathbf{0} \quad (58)$$

### 323 3.2.5 Aunts and uncles of Focal

324 The aunts and uncles of Focal (there seems to be no gender-inclusive term) are the siblings  
 325 of Focal’s parents.

326 The aunts and uncles through the older siblings receive no recruitment subsidy because  
 327 once Focal is born, her parents cannot add any older siblings. The initial condition com-  
 328 bines the older siblings of the mother and father of Focal, following the steps above for the  
 329 grandparents of focal. The resulting dynamics are

$$330 \quad \tilde{\mathbf{r}}(x+1) = \tilde{\mathbf{U}}\tilde{\mathbf{r}}(x) + \mathbf{0} \quad (59)$$

$$331 \quad \tilde{\mathbf{r}}(0) = \sum_i [\pi_f(i) + \pi_m(i)] \tilde{\mathbf{m}}(i) \quad (60)$$

332 Aunts and uncles through younger siblings receive a recruitment subsidy from the re-  
 333 production of the grandmothers of Focal. Grandmothers and grandfathers do not reproduce  
 334 independently, so only input from grandmothers is counted. The initial condition combines  
 335 the younger siblings of Focal’s mother and of Focal’s father, at the time of Focal’s birth.

336 The resulting dynamics are

$$337 \quad \tilde{\mathbf{s}}(x+1) = \tilde{\mathbf{U}}\tilde{\mathbf{s}}(x) + \tilde{\mathbf{F}}^* \tilde{\mathbf{g}}(x) \quad (61)$$

$$338 \quad \tilde{\mathbf{s}}(0) = \sum_i [\pi_f(i) + \pi_m(i)] \tilde{\mathbf{n}}(i) \quad (62)$$

---

<sup>3</sup>A slight modification of the initial conditions for older and younger siblings can account for the possibility of multiple births.

**Table 1:** The two-sex kinship model. In this table,  $\pi_{fm} = \pi_f + \pi_m$ . Compare this with the age-classified, multistate, and time-varying models in Appendix A.

| Symbol               | Kin                                           | initial condition $\mathbf{k}_0$           | Subsidy $\beta(x)$                           |
|----------------------|-----------------------------------------------|--------------------------------------------|----------------------------------------------|
| $\tilde{\mathbf{a}}$ | children                                      | $\mathbf{0}$                               | $\tilde{\mathbf{F}}\phi(x)$                  |
| $\tilde{\mathbf{b}}$ | grandchildren                                 | $\mathbf{0}$                               | $\tilde{\mathbf{F}}\tilde{\mathbf{a}}(x)$    |
| $\tilde{\mathbf{c}}$ | great-grandchildren                           | $\mathbf{0}$                               | $\tilde{\mathbf{F}}\tilde{\mathbf{b}}(x)$    |
| $\tilde{\mathbf{d}}$ | parents                                       | $\tilde{\boldsymbol{\pi}}$                 | $\mathbf{0}$                                 |
| $\tilde{\mathbf{g}}$ | grandparents                                  | $\sum_i \pi_{fm}(i) \tilde{\mathbf{d}}(i)$ | $\mathbf{0}$                                 |
| $\tilde{\mathbf{h}}$ | great-grandparents                            | $\sum_i \pi_{fm}(i) \tilde{\mathbf{g}}(i)$ | $\mathbf{0}$                                 |
| $\tilde{\mathbf{m}}$ | older siblings                                | $\sum_i \pi_f(i) \tilde{\mathbf{a}}(i)$    | $\mathbf{0}$                                 |
| $\tilde{\mathbf{n}}$ | younger siblings                              | $\mathbf{0}$                               | $\tilde{\mathbf{F}}^* \tilde{\mathbf{d}}(x)$ |
| $\tilde{\mathbf{p}}$ | nieces/nephews via older siblings             | $\sum_i \pi_f(i) \tilde{\mathbf{b}}(i)$    | $\tilde{\mathbf{F}}\tilde{\mathbf{m}}(x)$    |
| $\tilde{\mathbf{q}}$ | nieces/nephews via younger siblings           | $\mathbf{0}$                               | $\tilde{\mathbf{F}}\tilde{\mathbf{n}}(x)$    |
| $\tilde{\mathbf{r}}$ | aunts/uncles older than mother                | $\sum_i \pi_{fm}(i) \tilde{\mathbf{m}}(i)$ | $\mathbf{0}$                                 |
| $\tilde{\mathbf{s}}$ | aunts/uncles younger than mother              | $\sum_i \pi_{fm}(i) \tilde{\mathbf{n}}(i)$ | $\tilde{\mathbf{F}}^* \tilde{\mathbf{g}}(x)$ |
| $\tilde{\mathbf{t}}$ | cousins from aunts/uncles older than mother   | $\sum_i \pi_{fm}(i) \tilde{\mathbf{p}}(i)$ | $\tilde{\mathbf{F}}\tilde{\mathbf{r}}(x)$    |
| $\tilde{\mathbf{v}}$ | cousins from aunts/uncles younger than mother | $\sum_i \pi_{fm}(i) \tilde{\mathbf{q}}(i)$ | $\tilde{\mathbf{F}}\tilde{\mathbf{s}}(x)$    |

### 3.2.6 Cousins of Focal

The cousins of Focal are the children of the aunts and uncles of Focal. The cousins through the older aunts/uncles receive a recruitment subsidy from the reproduction of older aunts and uncles. These cousins are the nieces and nephews of Focal's mother through her older siblings.

The resulting dynamics are

$$\tilde{\mathbf{t}}(x+1) = \tilde{\mathbf{U}}\tilde{\mathbf{t}}(x) + \tilde{\mathbf{F}}\tilde{\mathbf{r}}(x) \quad (63)$$

$$\tilde{\mathbf{t}}(0) = \sum_i [\pi_f(i) + \pi_m(i)] \tilde{\mathbf{p}}(i) \quad (64)$$

The cousins through the aunts/uncles younger than mother receive a recruitment subsidy from the reproduction of those aunts and uncles. These cousins are the nieces and nephews of Focal's mother through her younger siblings.

The resulting dynamics are

$$\tilde{\mathbf{v}}(x+1) = \tilde{\mathbf{U}}\tilde{\mathbf{v}}(x) + \tilde{\mathbf{F}}\tilde{\mathbf{s}}(x) \quad (65)$$

$$\tilde{\mathbf{v}}(0) = \sum_i [\pi_f(i) + \pi_m(i)] \tilde{\mathbf{q}}(i) \quad (66)$$

The chains of descendants through these cousins can be extended indefinitely. Recruitment into each generation comes from the generation before it, and the initial condition consists of the corresponding level of nieces/nephews of Focal's mother.

## 4 Some two-sex kinship patterns: Senegal, Haiti, France

As an example, I explore some two-sex kinship patterns using mortality and fertility schedules for Senegal (2013), Haiti (2010), and France (2012). These were used by Schoumaker (2019) as examples of populations with large, medium, and small differences between female and male fertility schedules; see Table 2. In Senegal, male TFR is much greater than female

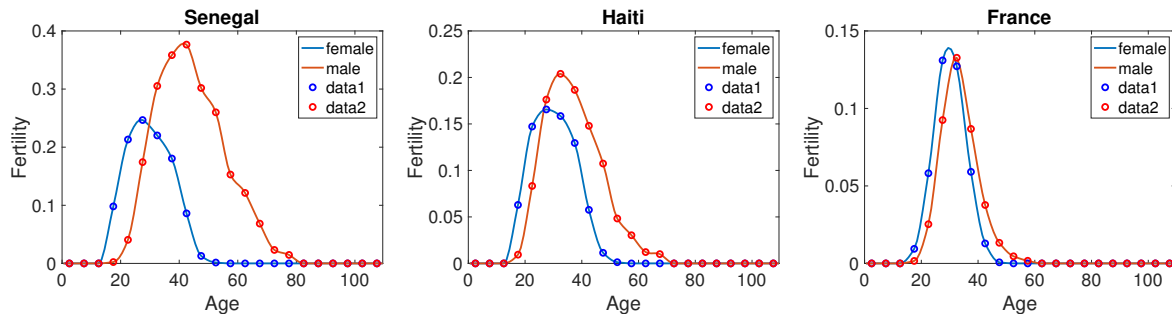

**Figure 7:** The observed (circles) and interpolated (lines) age-specific fertility rates for Senegal, Haiti, and France. Based on data from [Schoumaker \(2019\)](#).

|                  | Senegal | Haiti | France |
|------------------|---------|-------|--------|
| $e_0$ female     | 67.5    | 63.5  | 85.0   |
| $e_0$ male       | 63.8    | 59.3  | 78.7   |
| TFR female       | 5.3     | 3.7   | 2.0    |
| TFR male         | 11.0    | 5.1   | 2.0    |
| age at maternity | 29.8    | 31.1  | 30.1   |
| age at paternity | 44.1    | 37.0  | 33.5   |

**Table 2:** Male and female life expectancy ( $e_0$ ), total fertility rate (TFR), and mean ages at maternity and paternity for the data on Senegal, Haiti, and France used in the example calculations. Fertility figures from [Schoumaker \(2019, Appendix A\)](#). Life expectancy data from [United Nations \(2019\)](#).

361 TFR and mean age at paternity is much greater than mean age at maternity. In France, the  
 362 differences are reduced even further. The three populations also differ in mortality, and all  
 363 three show typical differences between female and male life expectancy.

#### 364 4.1 Fertility schedules

365 Age-specific fertility schedules in five-year age classes were kindly provided by Bruno Schoumaker  
 366 based on information in [Schoumaker \(2019\)](#). The five-year age classes were interpolated to  
 367 one-year age intervals, using the MATLAB function `interp1` with cubic spline interpolation  
 368 (MATLAB method `akemi`). The observed fertility rates and the interpolated rates used in  
 369 the model are shown in Figure 7.

#### 370 4.2 Mortality schedules

371 Mortality data for the three countries were obtained from United Nations compilations<sup>4</sup>  
 372 ([United Nations, 2019](#)). Survival probabilities were taken from abridged male and female life  
 373 tables for the time period 2010–2015. These five-year survival probabilities were transformed  
 374 to one-year probabilities, and then interpolated to one-year age intervals using cubic spline  
 375 interpolation. The UN life tables are truncated at 85 years of age; I extended them to age  
 376 100 by assuming that survival declined to 0 at age 100 and extrapolating the values between  
 377 age 85 and 100 using cubic splines.

#### 378 4.3 Numbers of female and male kin

379 Of the many results that could be calculated from the model, here I show results for the  
 380 numbers of female and male kin and sex ratios for each kind of kin, as a function of the

<sup>4</sup><https://population.un.org/wpp/Download/Archive/Standard/>



381 age of Focal. Results for kin numbers are shown in Figure 8. The three vertical columns  
382 represent, from left to right, Senegal, Haiti, and France. Each row is a different type of kin.

383 Looking down columns in Figure 8 we see the expected increase in grandchildren over  
384 children, and great-grandchildren over grandchildren. The increase is most marked in Seneg-  
385 gal, which has the highest fertility. Similarly, we see the expected reduction in grandparents  
386 relative to parents, and great-grandparents relative to grandparents. The reduction is most  
387 marked in Senegal, with the highest mortality.

388 The remaining kin types are affected by both fertility and mortality and the patterns  
389 are diverse. Niblings compared to siblings behave much like grandchildren when compared  
390 to children. Aunts and uncles behave much like parents because by the time of Focal's  
391 birth, new aunts and uncles are not likely to be produced, so the trajectory is dominated by  
392 mortality.

393 Comparing countries across rows in Figure 8, the main differences are those to be expected  
394 in comparisons of high to low fertility and high to low mortality populations. The numbers of  
395 children, grandchildren, and great-grandchildren decrease from Senegal to France. Parents,  
396 grandparents, and great-grandparents decline most rapidly with age in Senegal, and most  
397 slowly in France.

398 Siblings, nibblings, aunts-uncles, and cousins are affected, in different ways, by both mor-  
399 tality and fertility schedules. Focal accumulates more of these kin, more rapidly, and loses  
400 them more precipitously in Senegal than in Haiti and France.

401 In general, comparisons across the three countries emphasize the great difference in the  
402 sizes and structures of the kinship network created by the differences in mortality and fertility.

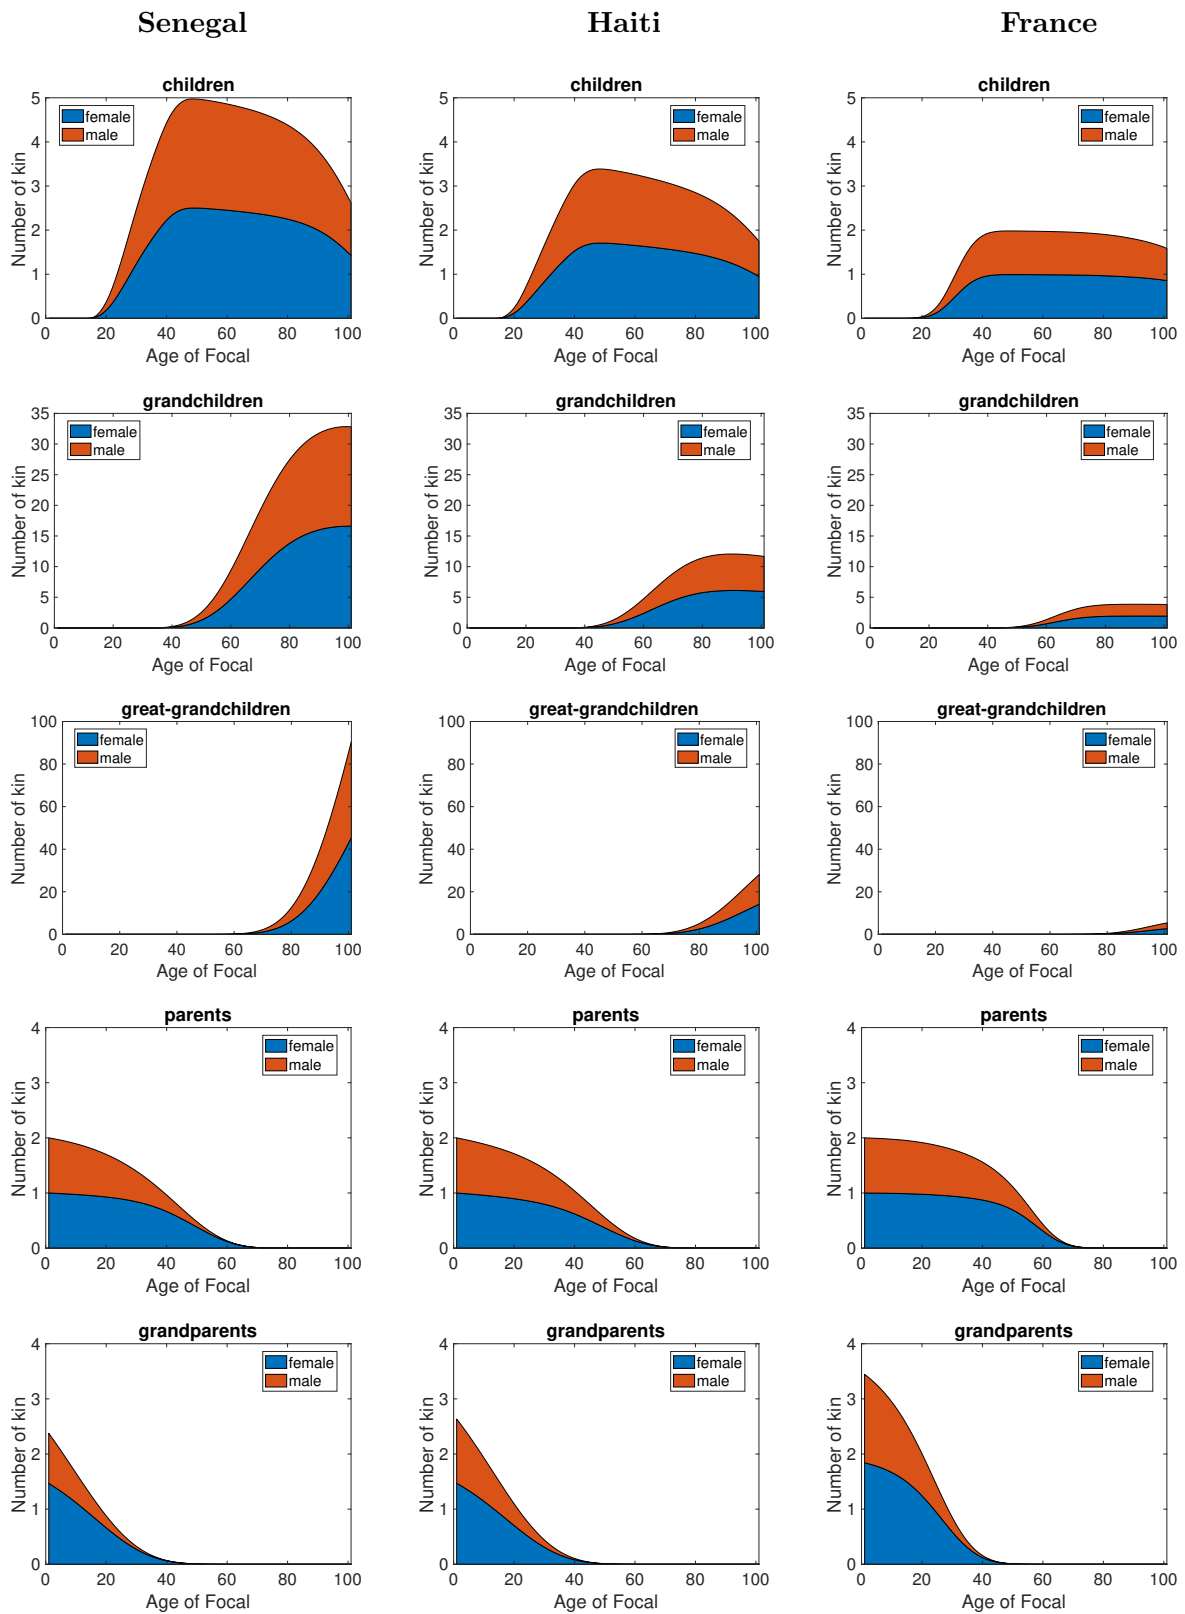

**Figure 8: (part 1 of 2)** The numbers of male and female kin as a function of the age of Focal. Data for Senegal (left column), Haiti (middle column), and France (right column). For clarity, the *y*-axis are the same across countries, but differ among kin types.

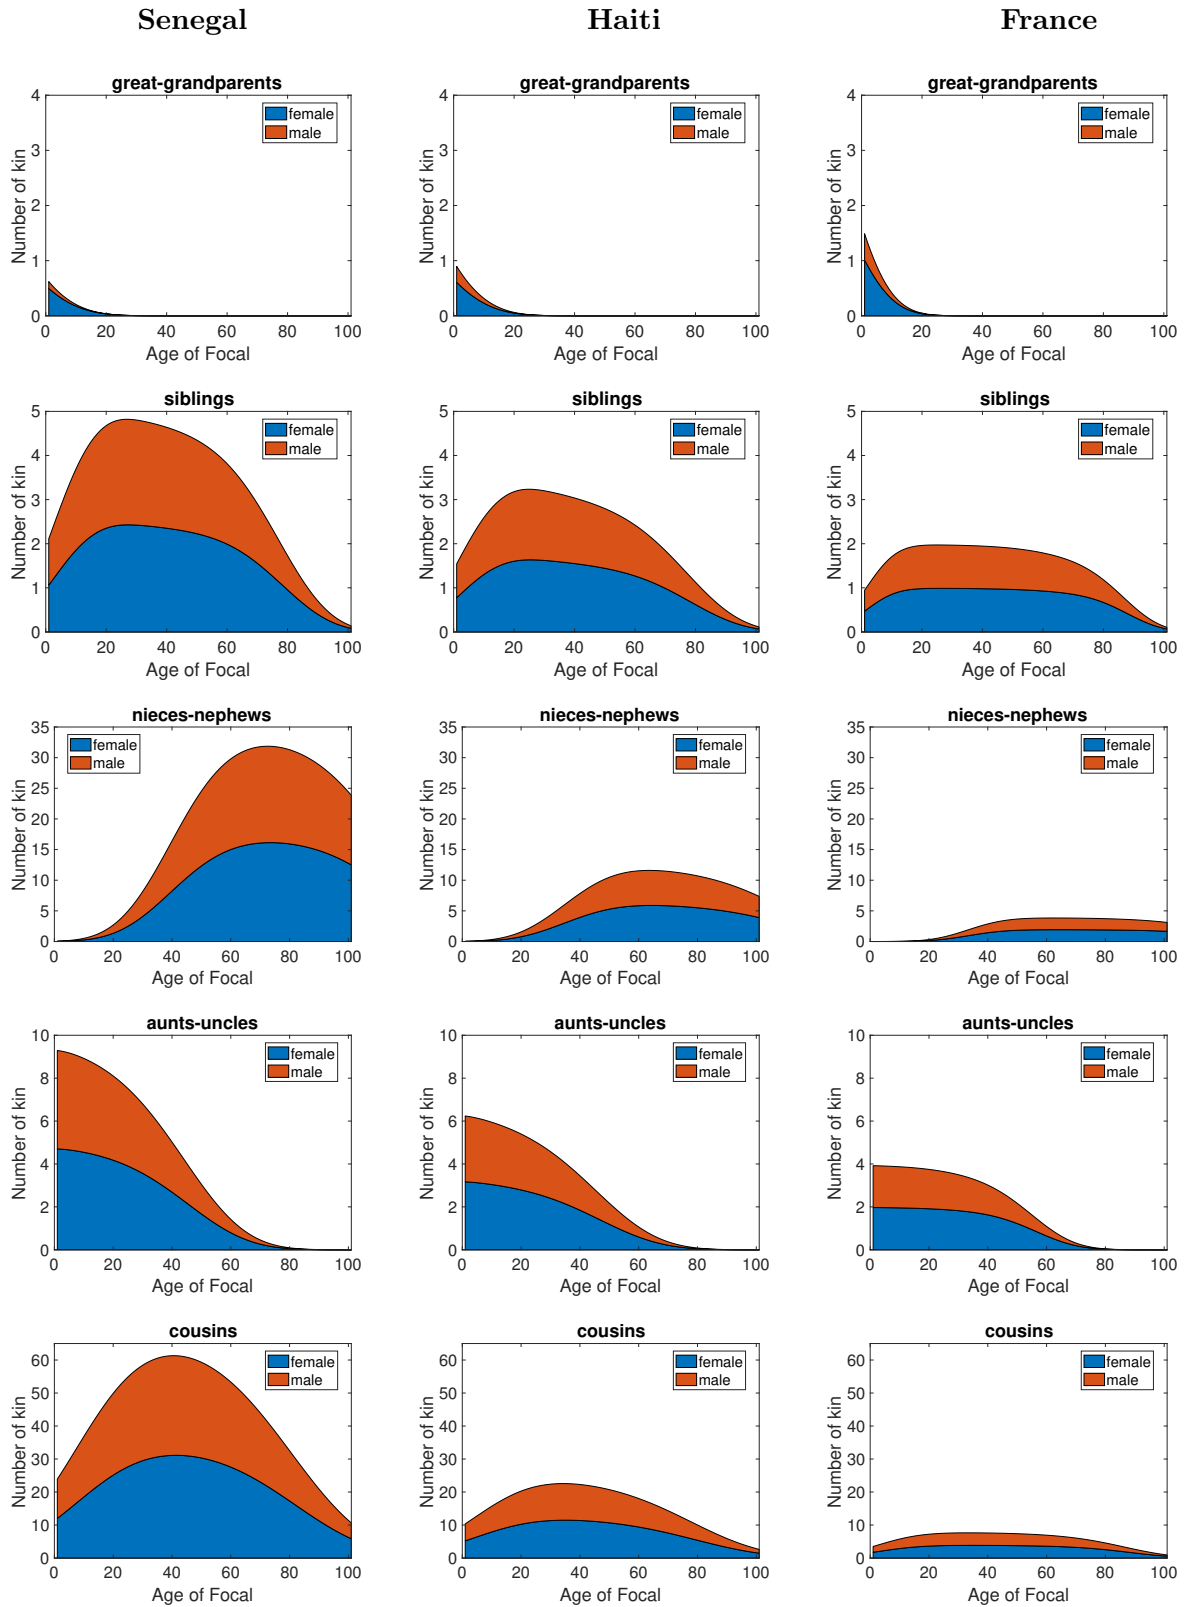

**Figure 8: (part 2 of 2)** The numbers of male and female kin as a function of the age of Focal. Data for Senegal (left column), Haiti (middle column), and France (right column).

#### 403 4.4 Kin sex ratios

404 What is hinted at, but not clearly apparent, in Figure 8 is the shift in the sex composition  
405 of the various kin as Focal ages. Figure 9 shows the sex ratio (number of males divided by  
406 number of females), for each type of kin, as a function of the age of Focal.

407 The sex ratio declines (i.e., females come to increasingly outnumber males) with increasing  
408 age of Focal in all cases. Children are of necessity younger than Focal; grandchildren and  
409 great-grandchildren even younger. Thus the reduction in sex ratio of her children as Focal  
410 ages is small. Parents, grandparents, and great-grandparents are correspondingly older than  
411 Focal, and their sex ratios decline dramatically with age of Focal. The declines among  
412 siblings (children of Focal's mother) and cousins (children of Focal's siblings) are similar.  
413 The sex ratios of niblings (the children of Focal's siblings) are similar to those of the children  
414 of Focal herself.

415 A comparison of the three countries hints at some processes that warrant further inves-  
416 tigation. Of the three countries, France shows the largest sex difference in life expectancy  
417 (Table 2). Its sex ratio might thus be expected to decline the most rapidly. This is true for  
418 some kin (aunts-uncles, cousins) but not for others (children, grandchildren). This suggests  
419 that the details of age-specific differences in mortality, rather than overall life expectancy,  
420 interact with the age structure of kin to determine the details of the sex ratio patterns. A  
421 sensitivity analysis of the kinship model, using methods similar to those of Caswell (2019b)  
422 would document the importance of mortality differences at every age to the changes in sex  
423 ratios.

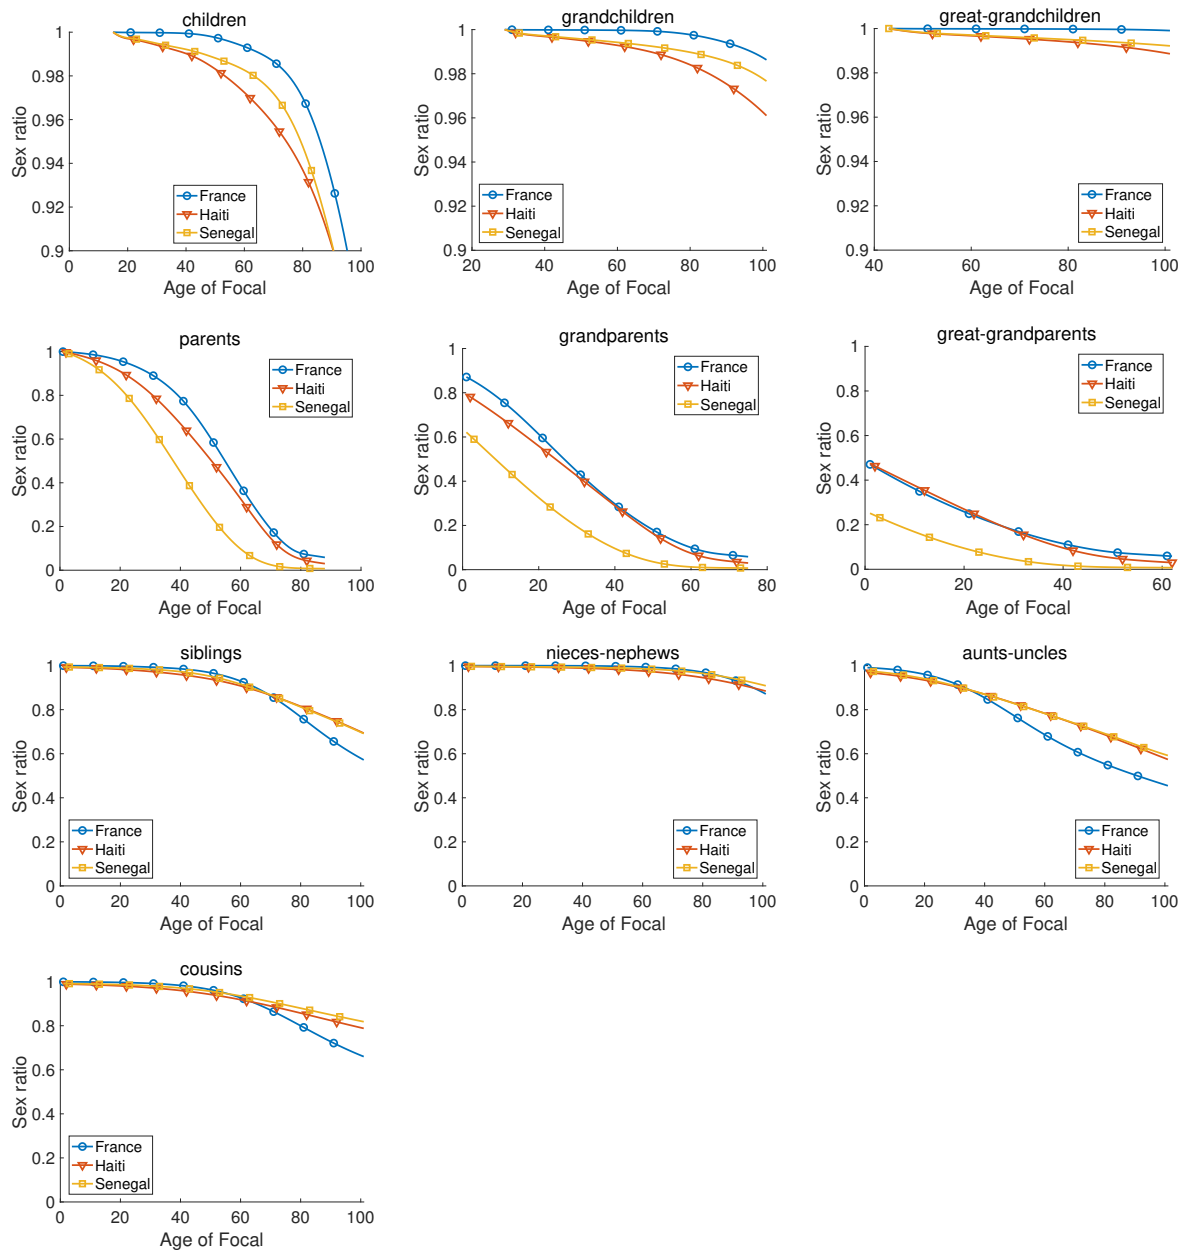

**Figure 9:** Sex ratios of kin (number of males divided by number of females) as a function of the age of Focal. Note that the  $y$ -axis scale for children, grandchildren, and great-grandchildren differs from that of other kin, to make patterns visible.

## 424 5 Approximations to the two-sex model

425 Complete age- and sex-specific mortality and fertility schedules are not always available. In  
 426 particular, male fertility data are less commonly reported than female fertility data (e.g.,  
 427 [Coleman 2000](#), but see [Schoumaker 2019](#)). Fortunately, the structure of the two-sex kinship  
 428 model readily admits approximations that utilize whatever mortality and fertility data are  
 429 available. Four such approximations are

430 **Model 1.** The full two-sex model, as presented here. It utilizes the fertility matrices  $\mathbf{F}_f$  and  
 431  $\mathbf{F}_m$  and the survival matrices  $\mathbf{U}_f$  and  $\mathbf{U}_m$ , see Section 3.

432 **Model 2.** In the absence of male fertility data, an approximation could use  $\mathbf{F}_f$  for both  
 433 female and male fertility. In this case, set

$$434 \quad \tilde{\mathbf{U}} = \begin{pmatrix} \mathbf{U}_f & \mathbf{0} \\ \mathbf{0} & \mathbf{U}_m \end{pmatrix} \quad (67)$$

$$435 \quad \tilde{\mathbf{F}} = \begin{pmatrix} \bar{\alpha}\mathbf{F}_f & \bar{\alpha}\mathbf{F}_f \\ \alpha\mathbf{F}_f & \alpha\mathbf{F}_f \end{pmatrix} \quad (68)$$

$$436 \quad \tilde{\mathbf{F}}^* = \begin{pmatrix} \bar{\alpha}\mathbf{F}_f & \mathbf{0} \\ \alpha\mathbf{F}_f & \mathbf{0} \end{pmatrix} \quad (69)$$

437 [Schoumaker \(2019\)](#) reports that the difference between male and female fertility is  
 438 least in countries with low fertility rates; this approximation should, therefore, be  
 439 most successful in such populations.

440 **Model 3.** In the absence of male mortality data, an approximation would apply the female  
 441 mortality schedule to both sexes. In this case, set

$$442 \quad \tilde{\mathbf{U}} = \begin{pmatrix} \mathbf{U}_f & \mathbf{0} \\ \mathbf{0} & \mathbf{U}_f \end{pmatrix} \quad (70)$$

$$443 \quad \tilde{\mathbf{F}} = \begin{pmatrix} \bar{\alpha}\mathbf{F}_f & \bar{\alpha}\mathbf{F}_m \\ \alpha\mathbf{F}_f & \alpha\mathbf{F}_m \end{pmatrix} \quad (71)$$

$$444 \quad \tilde{\mathbf{F}}^* = \begin{pmatrix} \bar{\alpha}\mathbf{F}_f & \mathbf{0} \\ \alpha\mathbf{F}_f & \mathbf{0} \end{pmatrix} \quad (72)$$

445 **Model 4.** In the absence of male rates of any kind, males and females could be treated as  
 446 indistinguishable. I refer to this as the *androgynous approximation*, in which female  
 447 rates are used for both sexes, leading to

$$448 \quad \tilde{\mathbf{U}} = \begin{pmatrix} \mathbf{U}_f & \mathbf{0} \\ \mathbf{0} & \mathbf{U}_f \end{pmatrix} \quad (73)$$

$$449 \quad \tilde{\mathbf{F}} = \begin{pmatrix} \bar{\alpha}\mathbf{F}_f & \bar{\alpha}\mathbf{F}_f \\ \alpha\mathbf{F}_f & \alpha\mathbf{F}_f \end{pmatrix} \quad (74)$$

$$450 \quad \tilde{\mathbf{F}}^* = \begin{pmatrix} \bar{\alpha}\mathbf{F}_f & \mathbf{0} \\ \alpha\mathbf{F}_f & \mathbf{0} \end{pmatrix} \quad (75)$$

451 In each of these cases, the calculations proceed as prescribed in Section 3, but using the  
 452 matrices specified here. The symmetrical cases in which male rates are used in place of  
 453 missing female rates are an obvious extension.

## 454 5.1 How good is the androgynous approximation?

455 The androgynous approximation deserves special consideration because it requires a min-  
456 imum amount of data. It uses female rates only, treating males and females as identical.  
457 However, it does project female and male kin as categories, which can be a useful extension  
458 of the one-sex model. A comparison of the full two-sex model and the androgynous approx-  
459 imation reveals the importance of including sex-specific rates. The case of Senegal, with its  
460 large differences between male and female fertility, is a worthwhile comparison.

461 Figure 10 shows the numbers of female and male kin of each type, as a function of the age  
462 of Focal, for Model 1 and Model 4, using the rates of Senegal because it has large differences  
463 between female and male rates. The differences between the two models are a measure of  
464 how much the sex-specific rates contribute to the structure of the kinship network (at least,  
465 as measured by numbers of kin).

466 In general, the differences are small, at most a fraction of an individual. A few kin  
467 types (female children, parents, and siblings) show no differences between the two-sex and  
468 the androgynous models. The differences between the two models are due to the effects of  
469 differences in mortality (two-sex vs. female only) and fertility (two-sex vs. female only). The  
470 differences can be decomposed into contributions from these two sources using the Kitagawa-  
471 Keyfitz decomposition (Kitagawa, 1955; Keyfitz, 1968, Section 7.4); see Caswell (2010) for  
472 description. Figure 11 shows the result of the decomposition for each kin type as a function  
473 of the age of Focal.

474 The sum of the contributions is positive in all cases: the androgynous Model 4 overes-  
475 timates the kin numbers obtained from the two-sex Model 1. The overall error from the  
476 androgynous model is less than one-half of an individual for all kin types except for great-  
477 grandchildren at old ages of Focal. Because children and siblings are unaffected by male  
478 fertility rates, the differences in kin numbers are totally due to the assumption of identical  
479 female and male mortality. All the other kin types are affected by both mortality and fertility  
480 assumptions.

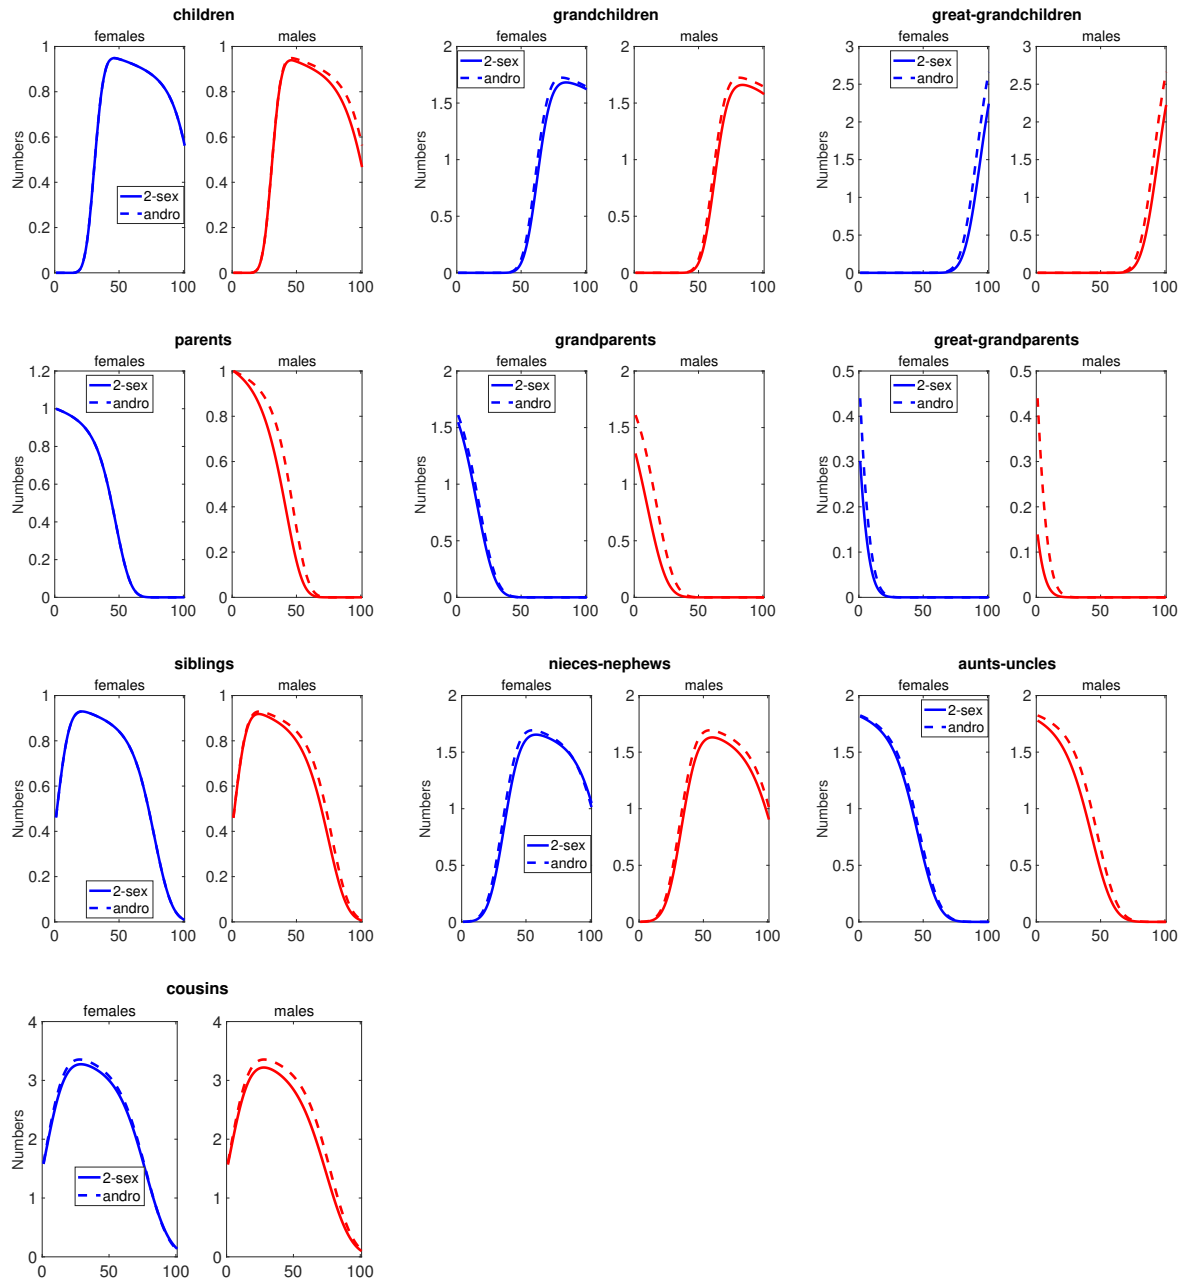

**Figure 10:** Male and female kin as calculated from the full two-sex Model 1 and the androgynous approximation Model 4. The latter model applies the same (female) rates to both sexes, based on the rates of Senegal.



### 481 5.1.1 The contributions of sex-specific mortality and fertility

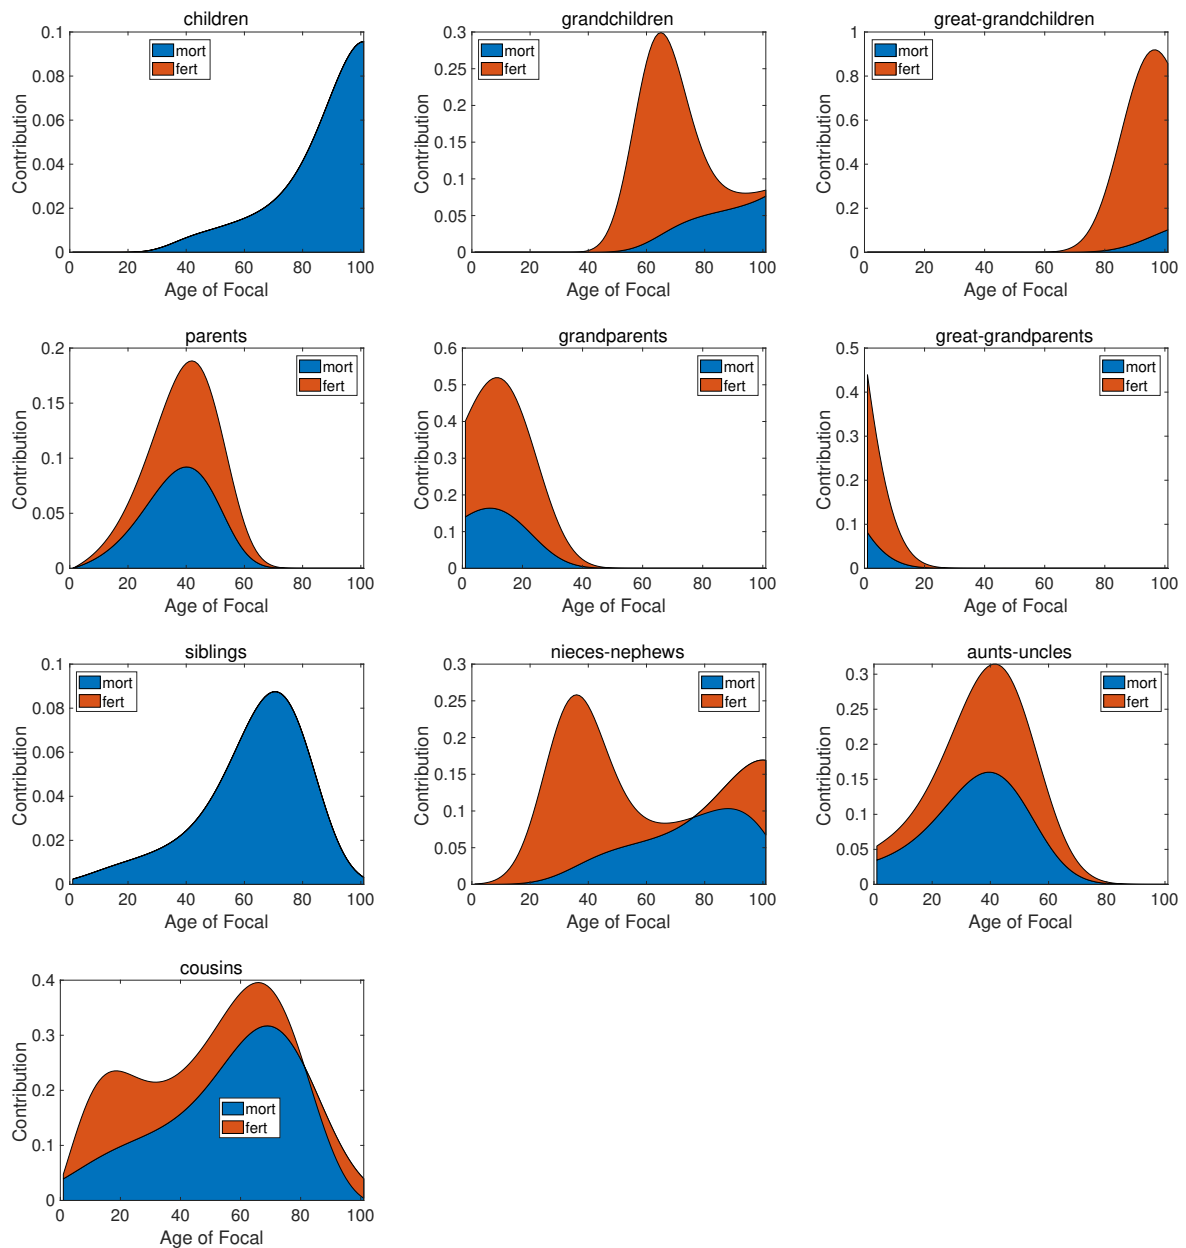

**Figure 11:** Decomposition analysis. The difference in kin numbers between the androgynous approximation Model 4 and the two-sex Model 1 is decomposed into contributions of differences in mortality and differences in fertility. Based on rates of Senegal.

### 482 5.1.2 Total kin numbers: the GKP factors

483 In the absence of information on male rates, [Goodman, Keyfitz, and Pullum \(1974\)](#) suggested  
484 multiplying the results of a one-sex model by a set of factors (I refer to these as the GKP  
485 factors) to obtain kin numbers for a scenario in which female and male rates were identical  
486 (i.e., our androgynous approximation Model 4). The GKP factors would multiply daughters  
487 by 2, granddaughters by 4, great-granddaughters by 8, mothers by 2, grandmothers by 4,  
488 great-grandmothers by 8, sisters by 2, nieces by 4, aunts by 4, and cousins by 8.

489 Calculations under the Senegal rates show, not surprisingly, that the GKP factors do  
490 give exactly the androgynous Model 4 kin numbers. Thus the results of Figure 11) also give  
491 the error resulting from using the GKP factors to approximate the results of the full two-sex  
492 model.

493 It should be noted that these comparisons are based on numbers of kin. Other results,  
494 especially those concerning sex ratios and sex-specific prevalences, cannot be approximated  
495 by one-sex models.

## 496 6 Discussion

497 The model presented here analyzes the effects of the sexes by treating sex as an individual  
498 state variable in addition to age. As is generally true of such multistate models (Caswell  
499 et al., 2018) the form of the model is unchanged<sup>5</sup> but the vectors and matrices take on a  
500 structure that reflects the enlarged state space:

- 501 • the age structure vector  $\mathbf{k}(x)$  is replaced by the age $\times$ stage vector  $\tilde{\mathbf{k}}(x)$ ,
- 502 • the survival matrix  $\mathbf{U}$  is replaced by the block-structured matrix  $\tilde{\mathbf{U}}$ ,
- 503 • the fertility matrix  $\mathbf{F}$  is replaced with the block structured matrices  $\tilde{\mathbf{F}}$  and  $\tilde{\mathbf{F}}^*$ , and
- 504 • the age at maternity distribution  $\boldsymbol{\pi}$  is replaced by the maternity and paternity distri-  
505 butions  $\boldsymbol{\pi}_f$  and  $\boldsymbol{\pi}_m$ .

506 The dynamics of the two-sex model reflect the independence of reproduction by some kin  
507 (e.g., sons and daughters of Focal produce grandchildren independently) but dependence  
508 in others (e.g., Focal’s mother and father do not produce siblings of Focal independently).  
509 The summaries in Table 1 (two-sex) and Tables A-1 (the one-sex model of Caswell 2019a),  
510 A-2 (the age $\times$ stage -classified model of Caswell 2020), and A-3 (the time-varying model of  
511 Caswell and Song 2021) emphasize this formal similarity.

512 The formal similarity is more than a convenience. It permits the two-sex model to be  
513 extended to arbitrary kin types just as the one-sex model has been (although Coste et al.  
514 (2021) referred to the method as limited to a specific set of kin, this is not correct). Dead  
515 kin and the experience of kin loss can be included just as in Caswell (2019a). Additional  
516 state variables can be added as was done for an age $\times$ parity model in Caswell (2020). If time  
517 series of two-sex rates were available, time variation could be incorporated as in the models  
518 of Caswell and Song (2021) and Song and Caswell (2021).

519 This paper has focused on the numbers and sex ratios of kin. But because the model  
520 provides the full age $\times$ sex structure for each type of kin, many other kinds of weighted num-  
521 bers (e.g., dependency ratios) are easily computed. Of particular interest are quantities that  
522 might, in general, be called “prevalences” — measures of the occurrence of some property,  
523 at specified ages, for each sex. The properties are often medical or health conditions (e.g.,  
524 Caswell, 2019a, for an analysis of dementia). The prevalences of many conditions are strongly  
525 sex dependent. Some cancers, for example, exhibit highly skewed prevalences. In the United  
526 States in 2021, new cases of lung cancer, per capita, were 25% higher in men than in women.  
527 New cases of kidney cancer were twice as frequent in men, and of bladder cancer four times  
528 as frequent (National Cancer Institute, 2021). The prevalence of obstructive sleep apnea in  
529 a population in Brazil is both strongly age-dependent (increasing by about three-fold from  
530 age 20 to age 80) and sex-dependent (by four-fold controlling for age and other variables)  
531 (Tufik et al., 2010).

532 Sex-specific prevalences, in a more general sense, also appear in non-medical conditions.  
533 For example, the income level of kin could be an important issue for Focal, and the gender  
534 gap in pay rates is widespread and well known. In the EU as of 2014, women earned from  
535 1% (Romania) to 24% (Estonia) less than men, with an average gap of 14% (Boll and

---

<sup>5</sup>This invariance of form, and hence of analysis, is part of the definition of “formal” in formal demography.

536 Lagerman, 2018). Song and Caswell (2021) analyzed unemployment among kin, but had  
537 to rely on applying the GKP factors to a one-sex model, and thus could not incorporate  
538 sex-specific unemployment. Such an analysis would be possible using the two-sex model.

539 Many gender-specific demographic and sociological variables can be related to kinship  
540 structures using this model. In light of this goal, the apparent adequacy of the androgynous  
541 approximation to the full two-sex model, in a case (Senegal) with quite large male-female  
542 differences, is encouraging. It appears safe to use the approximations listed in Section 5,  
543 especially in cases where both male and female mortality are available, but male fertility is  
544 lacking. Notice that the differences in numbers of kin between the two-sex model and the  
545 androgynous approximation (Figures 10 and 11) are much smaller than the differences in kin  
546 numbers among the three countries examined here (Figure 8). More comparative research is  
547 warranted.

548 The possible use of model fertility schedules (e.g., Coale and Trussell, 1974) when mea-  
549 sured fertility data are lacking deserves further research. Paget and Timaeus (1994), ex-  
550 tending work of Booth (1984), describe a relational model for male fertility,<sup>6</sup> The relational  
551 model produces fertility patterns (their Figure 2) not unlike those in Figure 7.

552 Despite the growing list of factors included in the matrix kinship models, limitations  
553 and open research questions remain. Multiple births, for example, are not included. This  
554 is easily addressed and is especially important in biodemography and population biology if  
555 one is interested in the kinship structure of species whose fertility patterns are very different  
556 from ours (Caswell, 2021).

557 The distributions of ages at maternity and paternity of Focal's mother and father deter-  
558 mine initial conditions for kin. These ages have been treated here as independent; an obvious  
559 extension would be to use a joint distribution reflecting the age distribution of couples.

560 This model, like previous models, is limited to consanguineal, biological kin. The chal-  
561 lenge of incorporating affinal kin, stepkin, kin by marriage, and blended families is an open  
562 research question. Perhaps a first step towards a solution would be to combine the kinship  
563 networks of two Focal individuals of different ages to provide a picture of a blended set of  
564 kin.<sup>7</sup> The ages of the Focal individuals to be combined might be chosen from a distribution  
565 of the ages of parents forming blended families.

566 Finally, it is important to recall that the projections of the kin populations provide mean  
567 age-sex structures, over the distributions produced by the survival and fertility probabilities.  
568 Because the kin populations are small, there will be an (as yet unknown) degree of stochastic  
569 variation around those means.

570 In summary, the matrix theoretic model makes it possible to expand the demographic  
571 detailed included the analysis of a kinship network: from age distributions to multistate  
572 age×stage distributions, from time-invariant to time-varying demographic rates, and now  
573 from one-sex to two-sex models. It has resulted in an increasingly rich set of demographic  
574 outcomes, including many of great demographic interest, including (but not limited to)  
575 bereavement, dependency, prevalences, family sizes, and sex ratios. All these are now subject  
576 to analysis in terms of demographic rates in a kinship setting.

<sup>6</sup>I must confess that I do not understand this paper.

<sup>7</sup>Much as in the case of:

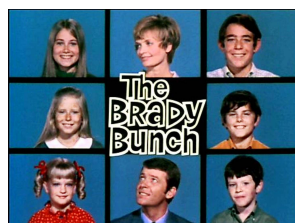

## 577 7 Acknowledgments

578 This research was supported by the European Research Council under the European Union's  
579 Horizon 2020 research and innovation program through ERC Advanced Grant 788195. Mo-  
580 tion Coffee in Amsterdam provided a pleasant environment for work on this and other  
581 projects. I thank Xi Song for discussions, and am especially grateful to Bruno Schoumaker  
582 for providing the male fertility data used in the examples here.

## 583 References

- 584 Boll, C. and Lagerman, A. (2018). *Gender pay gap in EU countries based on SES (2014)*.  
585 Tech. rep., European Commission, Luxembourg: Publications Office of the European  
586 Union.
- 587 Booth, H. (1984). Transforming Gompertz's function for fertility analysis: The development  
588 of a standard for the relational Gompertz function. *Population Studies* 38(3): 495–506.
- 589 Bribiescas, R.G. (2016). *How men age: What evolution reveals about male health and mor-*  
590 *tality*. Princeton, New Jersey, USA: Princeton University Press.
- 591 Caswell, H. (2010). Life table response experiment analysis of the stochastic growth rate.  
592 *Journal of Ecology* 98(2): 324–333.
- 593 Caswell, H. (2019a). The formal demography of kinship: A matrix formulation. *Demographic*  
594 *Research* 41: 679–712.
- 595 Caswell, H. (2019b). *Sensitivity Analysis: Matrix Methods for Demography and Ecology*.  
596 Demographic Research Monographs. Cham, Switzerland: Springer Nature.
- 597 Caswell, H. (2020). The formal demography of kinship. II. Multistate models, parity, and  
598 sibship. *Demographic Research* 42: 1097–1144.
- 599 Caswell, H. (2021). The demography of kinship: A new axis for exploring life histories and  
600 population structure. Presentation at Annual Meeting of Ecological Society of America,  
601 August 2021.
- 602 Caswell, H., de Vries, C., Hartemink, N., Roth, G., and van Daalen, S.F. (2018). Age  $\times$  stage-  
603 classified demographic analysis: a comprehensive approach. *Ecological Monographs* 88(4):  
604 560–584.
- 605 Caswell, H. and Song, X. (2021). The formal demography of kinship. III. kinship dynamics  
606 with time-varying demographic rates. *Demographic Research* 45: 517–546.
- 607 Clark, R. and Peck, B.M. (2012). Examining the gender gap in life expectancy: A cross-  
608 national analysis, 1980–2005. *Social Science Quarterly* 93(3): 820–837.
- 609 Coale, A.J. and Trussell, T.J. (1974). Model fertility schedules: variations in the age structure  
610 of childbearing in human populations. *Population Index* 185–258.
- 611 Coleman, D.A. (2000). Male fertility trends in industrial countries: Theories in search of  
612 some evidence. In: Bledsoe, C., Lerner, S., and Guyer, J. (eds.). *Fertility and the male life*  
613 *cycle in the era of fertility decline*. Oxford, U.K.: Oxford University Press: 29–60.
- 614 Coste, C.F., Bienvenu, F., Ronget, V., Ramirez-Loza, J.P., Cubaynes, S., and Pavard, S.  
615 (2021). The kinship matrix: inferring the kinship structure of a population from its  
616 demography. *Ecology Letters* 24(12): 2750–2762.

- 617 Dublin, L.I., Lotka, A.J., and Spiegelman, M. (1949). *Length of Life*. New York, New York:  
618 Ronald.
- 619 Glei, D.A. and Horiuchi, S. (2007). The narrowing sex differential in life expectancy in  
620 high-income populations: effects of differences in the age pattern of mortality. *Population*  
621 *Studies* 61(2): 141–159.
- 622 Goodman, L.A., Keyfitz, N., and Pullum, T.W. (1974). Family formation and the frequency  
623 of various kinship relationships. *Theoretical Population Biology* 5(1): 1–27.
- 624 Iannelli, M., Martcheva, M., and Milner, F.A. (2005). *Gender-structured population model-*  
625 *ing: mathematical methods, numerics, and simulations*. Philadelphia, Pennsylvania, USA:  
626 SIAM.
- 627 Keyfitz, N. (1972). The mathematics of sex and marriage. *Proceedings of the Fourth Berkeley*  
628 *Symposium on Mathematical Statistics and Probability* 6: 89–108.
- 629 Keyfitz, N. (1968). *Introduction to the Mathematics of Population*. Reading, Massachusetts,  
630 USA: Addison-Wesley.
- 631 Keyfitz, N. and Caswell, H. (2005). *Applied Mathematical Demography*. New York, New  
632 York: Springer, 3rd ed.
- 633 Kitagawa, E.M. (1955). Components of a difference between two rates. *Journal of the*  
634 *American Statistical Association* 50: 1168–1194.
- 635 Kühnert, B. and Nieschlag, E. (2004). Reproductive functions of the ageing male. *Human*  
636 *Reproduction Update* 10(4): 327–339.
- 637 Luy, M. and Minagawa, Y. (2014). Gender gaps—Life expectancy and proportion of life in  
638 poor health. *Health Reports* 25(12): 12–19.
- 639 National Cancer Institute (2021). Surveillance, Epidemiology, and End Results Program:  
640 Cancer Stat Facts. [electronic resource]. URL <https://seer.cancer.gov/statfacts/>.
- 641 Oberzaucher, E. and Grammer, K. (2014). The case of Moulay Ismael—fact or fancy? *PloS*  
642 *ONE* 9(2): e85292.
- 643 Oksuzyan, A., Shkolnikova, M., Vaupel, J.W., Christensen, K., and Shkolnikov, V.M. (2014).  
644 Sex differences in health and mortality in Moscow and Denmark. *European Journal of*  
645 *Epidemiology* 29(4): 243–252.
- 646 Paget, W.J. and Timaeus, I.M. (1994). A relational Gompertz model of male fertility:  
647 Development and assessment. *Population Studies* 48(2): 333–340.
- 648 Raftery, A.E., Lalic, N., and Gerland, P. (2014). Joint probabilistic projection of female and  
649 male life expectancy. *Demographic Research* 30: 795–822.
- 650 Robine, J.M. and Vaupel, J.W. (2001). Supercentenarians: Slower ageing individuals or  
651 senile elderly? *Experimental Gerontology* 36(4-6): 915–930.
- 652 Schoumaker, B. (2019). Male fertility around the world and over time: How different is it  
653 from female fertility? *Population and Development Review* 45(3): 459–487.
- 654 Shyu, E. and Caswell, H. (2018). Mating, births, and transitions: a flexible two-sex matrix  
655 model for evolutionary demography. *Population Ecology* (in press).

- 656 Song, X. and Caswell, H. (2021). The role of racial differences in exposure to unemployment.  
657 *Demography* (accepted).
- 658 Tanskanen, A.O. and Danielsbacka, M. (2019). *Intergenerational Family Relations: An*  
659 *Evolutionary Social Science Approach*. Routledge Advances in Sociology. New York, New  
660 York, USA: Routledge.
- 661 Tufik, S., Santos-Silva, R., Taddei, J.A., and Bittencourt, L.R.A. (2010). Obstructive sleep  
662 apnea syndrome in the Sao Paulo epidemiologic sleep study. *Sleep Medicine* 11(5): 441–  
663 446.
- 664 Tuljapurkar, S.D., Puleston, C.O., and Gurven, M.D. (2007). Why men matter: mating  
665 patterns drive evolution of human lifespan. *PLoS ONE* 2(8): e785.
- 666 United Nations (2019). *World Population Prospects 2019*. Tech. Rep. Revision 2019, United  
667 Nations Department of Economic and Social Affairs, Population Division.

## 668 A One-sex, time-varying, and multistate kinship models

669 This appendix presents tables showing the expressions for the kinship dynamics in one-sex,  
 670 multistate, and time-varying kinship models. Comparison of these tables with with Table 1  
 671 shows the formal similarity of the four models. Tables are modified from their cited sources  
 672 under the terms of a Creative Commons Attribution license.

**Table A-1:** The age-classified, time-invariant, one-sex kinship model of Caswell (2019a).

| Symbol   | Kin                                    | initial condition $\mathbf{k}_0$ | Subsidy $\beta(x)$        |
|----------|----------------------------------------|----------------------------------|---------------------------|
| <b>a</b> | daughters                              | $\mathbf{0}$                     | $\mathbf{F}\mathbf{e}_x$  |
| <b>b</b> | granddaughters                         | $\mathbf{0}$                     | $\mathbf{F}\mathbf{a}(x)$ |
| <b>c</b> | great-granddaughters                   | $\mathbf{0}$                     | $\mathbf{F}\mathbf{b}(x)$ |
| <b>d</b> | mothers                                | $\boldsymbol{\pi}$               | $\mathbf{0}$              |
| <b>g</b> | grandmothers                           | $\sum_i \pi_i \mathbf{d}(i)$     | $\mathbf{0}$              |
| <b>h</b> | great-grandmothers                     | $\sum_i \pi_i \mathbf{g}(i)$     | $\mathbf{0}$              |
| <b>m</b> | older sisters                          | $\sum_i \pi_i \mathbf{a}(i)$     | $\mathbf{0}$              |
| <b>n</b> | younger sisters                        | $\mathbf{0}$                     | $\mathbf{F}\mathbf{d}(x)$ |
| <b>p</b> | nieces via older sisters               | $\sum_i \pi_i \mathbf{b}(i)$     | $\mathbf{F}\mathbf{m}(x)$ |
| <b>q</b> | nieces via younger sisters             | $\mathbf{0}$                     | $\mathbf{F}\mathbf{n}(x)$ |
| <b>r</b> | aunts older than mother                | $\sum_i \pi_i \mathbf{m}(i)$     | $\mathbf{0}$              |
| <b>s</b> | aunts younger than mother              | $\sum_i \pi_i \mathbf{n}(i)$     | $\mathbf{F}\mathbf{g}(x)$ |
| <b>t</b> | cousins from aunts older than mother   | $\sum_i \pi_i \mathbf{p}(i)$     | $\mathbf{F}\mathbf{r}(x)$ |
| <b>v</b> | cousins from aunts younger than mother | $\sum_i \pi_i \mathbf{q}(i)$     | $\mathbf{F}\mathbf{s}(x)$ |

673

**Table A-2:** Summary of the age×stage-classified kinship model of Caswell (2020). Matrices and vectors bearing tildes (e.g.,  $\tilde{\mathbf{a}}$ ) age×stage block-structured.

| Symbol               | Kin                                | initial condition $\mathbf{k}_0$                  | Subsidy $\beta(x)$                        |
|----------------------|------------------------------------|---------------------------------------------------|-------------------------------------------|
| $\tilde{\phi}$       | Focal                              | $\tilde{\phi}_0$                                  | $\mathbf{0}$                              |
| $\tilde{\mathbf{a}}$ | daughters                          | $\mathbf{0}$                                      | $\tilde{\mathbf{F}}\tilde{\phi}(x)$       |
| $\tilde{\mathbf{b}}$ | granddaughters                     | $\mathbf{0}$                                      | $\tilde{\mathbf{F}}\tilde{\mathbf{a}}(x)$ |
| $\tilde{\mathbf{c}}$ | great-granddaughters               | $\mathbf{0}$                                      | $\tilde{\mathbf{F}}\tilde{\mathbf{b}}(x)$ |
| $\tilde{\mathbf{d}}$ | mothers                            | $\tilde{\boldsymbol{\pi}}$                        | $\mathbf{0}$                              |
| $\tilde{\mathbf{g}}$ | grandmothers                       | $\sum_i \pi_i^{\text{age}} \tilde{\mathbf{d}}(i)$ | $\mathbf{0}$                              |
| $\tilde{\mathbf{h}}$ | great-grandmothers                 | $\sum_i \pi_i^{\text{age}} \tilde{\mathbf{g}}(i)$ | $\mathbf{0}$                              |
| $\tilde{\mathbf{m}}$ | older sisters                      | $\sum_i \pi_i^{\text{age}} \tilde{\mathbf{a}}(i)$ | $\mathbf{0}$                              |
| $\tilde{\mathbf{n}}$ | younger sisters                    | $\mathbf{0}$                                      | $\tilde{\mathbf{F}}\tilde{\mathbf{d}}(i)$ |
| $\tilde{\mathbf{p}}$ | nieces via older sisters           | $\sum_i \pi_i^{\text{age}} \tilde{\mathbf{b}}(i)$ | $\tilde{\mathbf{F}}\tilde{\mathbf{m}}(x)$ |
| $\tilde{\mathbf{q}}$ | nieces via younger sisters         | $\mathbf{0}$                                      | $\tilde{\mathbf{F}}\tilde{\mathbf{n}}(i)$ |
| $\tilde{\mathbf{r}}$ | aunts older than mother            | $\sum_i \pi_i^{\text{age}} \tilde{\mathbf{m}}(x)$ | $\mathbf{0}$                              |
| $\tilde{\mathbf{s}}$ | aunts younger than mother          | $\sum_i \pi_i^{\text{age}} \tilde{\mathbf{n}}(i)$ | $\tilde{\mathbf{F}}\tilde{\mathbf{g}}(x)$ |
| $\tilde{\mathbf{t}}$ | cousins: aunts older than mother   | $\sum_i \pi_i^{\text{age}} \tilde{\mathbf{p}}(i)$ | $\tilde{\mathbf{F}}\tilde{\mathbf{r}}(x)$ |
| $\tilde{\mathbf{v}}$ | cousins: aunts younger than mother | $\sum_i \pi_i^{\text{age}} \tilde{\mathbf{q}}(i)$ | $\tilde{\mathbf{F}}\tilde{\mathbf{s}}(x)$ |

**Table A-3:** The time-varying kinship model of [Caswell and Song \(2021\)](#). Age (of Focal) and time are denoted by  $x$  and  $t$ , respectively. For each type of kin, the relevant age boundary condition, survival dynamics, and reproductive subsidy are shown.

| Kin                                                   | age boundary                       | survival                        | subsidy $\beta(x)$              |
|-------------------------------------------------------|------------------------------------|---------------------------------|---------------------------------|
| $\mathbf{a}(x, t)$ daughters                          | $\mathbf{0}$                       | $\mathbf{U}_t \mathbf{a}(x, t)$ | $\mathbf{F}_t \mathbf{e}_x$     |
| $\mathbf{b}(x, t)$ granddaughters                     | $\mathbf{0}$                       | $\mathbf{U}_t \mathbf{b}(x, t)$ | $\mathbf{F}_t \mathbf{a}(x, t)$ |
| $\mathbf{c}(x, t)$ great-granddaughters               | $\mathbf{0}$                       | $\mathbf{U}_t \mathbf{c}(x, t)$ | $\mathbf{F}_t \mathbf{b}(x, t)$ |
| $\mathbf{d}(x, t)$ mothers                            | $\boldsymbol{\pi}(t)$              | $\mathbf{U}_t \mathbf{d}(x, t)$ | $\mathbf{0}$                    |
| $\mathbf{g}(x, t)$ grandmothers                       | $\sum_i \pi_i(t) \mathbf{d}(i, t)$ | $\mathbf{U}_t \mathbf{g}(x, t)$ | $\mathbf{0}$                    |
| $\mathbf{h}(x, t)$ great-grandmothers                 | $\sum_i \pi_i(t) \mathbf{g}(i, t)$ | $\mathbf{U}_t \mathbf{h}(x, t)$ | $\mathbf{0}$                    |
| $\mathbf{m}(x, t)$ older sisters                      | $\sum_i \pi_i(t) \mathbf{a}(i, t)$ | $\mathbf{U}_t \mathbf{m}(x, t)$ | $\mathbf{0}$                    |
| $\mathbf{n}(x, t)$ younger sisters                    | $\mathbf{0}$                       | $\mathbf{U}_t \mathbf{n}(x, t)$ | $\mathbf{F}_t \mathbf{d}(x, t)$ |
| $\mathbf{p}(x, t)$ nieces via older sisters           | $\sum_i \pi_i(t) \mathbf{b}(i, t)$ | $\mathbf{U}_t \mathbf{p}(x, t)$ | $\mathbf{F}_t \mathbf{m}(x, t)$ |
| $\mathbf{q}(x, t)$ nieces via younger sisters         | $\mathbf{0}$                       | $\mathbf{U}_t \mathbf{q}(x, t)$ | $\mathbf{F}_t \mathbf{n}(x, t)$ |
| $\mathbf{r}(x, t)$ aunts older than mother            | $\sum_i \pi_i(t) \mathbf{m}(i, t)$ | $\mathbf{U}_t \mathbf{r}(x, t)$ | $\mathbf{0}$                    |
| $\mathbf{s}(x, t)$ aunts younger than mother          | $\sum_i \pi_i(t) \mathbf{n}(i, t)$ | $\mathbf{U}_t \mathbf{s}(x, t)$ | $\mathbf{F}_t \mathbf{g}(x, t)$ |
| $\mathbf{t}(x, t)$ cousins; aunts older than mother   | $\sum_i \pi_i(t) \mathbf{p}(i, t)$ | $\mathbf{U}_t \mathbf{t}(x, t)$ | $\mathbf{F}_t \mathbf{r}(x, t)$ |
| $\mathbf{v}(x, t)$ cousins; aunts younger than mother | $\sum_i \pi_i(t) \mathbf{q}(i, t)$ | $\mathbf{U}_t \mathbf{v}(x, t)$ | $\mathbf{F}_t \mathbf{s}(x, t)$ |
